1 **Integration of the cyanophage-encoded phosphate binding protein into the**  
2 **cyanobacterial phosphate uptake system**

3

4 Fangxin Zhao<sup>a,1</sup>, Xingqin Lin<sup>b,1</sup>, Kun Cai<sup>c,d,1</sup>, YongLiang Jiang<sup>c,d</sup>, Tianchi Ni<sup>b</sup>, Yue Chen<sup>a</sup>,  
5 Jianrong Feng<sup>b</sup>, Shangyu Dang<sup>b,e,f</sup>, Cong-Zhao Zhou<sup>c,d,2</sup>, and Qinglu Zeng<sup>a,b,f,2</sup>

6

7 <sup>a</sup>Department of Ocean Science, The Hong Kong University of Science and Technology, Clear  
8 Water Bay, Hong Kong, China;

9 <sup>b</sup>Division of Life Science, The Hong Kong University of Science and Technology, Clear  
10 Water Bay, Hong Kong, China;

11 <sup>c</sup>Hefei National Laboratory for Physical Sciences at the Microscale, University of Science  
12 and Technology of China, Hefei, Anhui, 230027, China;

13 <sup>d</sup>School of Life Sciences, University of Science and Technology of China, Hefei, Anhui,  
14 230027, China;

15 <sup>e</sup>Center of Systems Biology and Human Health, Hong Kong University of Science and  
16 Technology, Clear Water Bay, Hong Kong, China;

17 <sup>f</sup>Hong Kong Branch of Southern Marine Science and Engineering Guangdong Laboratory  
18 (Guangzhou), The Hong Kong University of Science and Technology, Clear Water Bay,  
19 Hong Kong, China.

20

21 <sup>1</sup>Authors contributed equally to this work

22 <sup>2</sup>To whom correspondence may be addressed. Emails: zeng@ust.hk and zcz@ustc.edu.cn

23

## 24 **Abstract**

25 To acquire phosphorus, cyanobacteria use the typical bacterial ABC-type phosphate  
26 transporter, which is composed of a periplasmic high-affinity phosphate-binding protein PstS  
27 and a channel formed by two transmembrane proteins PstC and PstA. The *pstS* gene has been  
28 identified in the genomes of cyanophages that infect the unicellular cyanobacteria  
29 *Prochlorococcus* and *Synechococcus*. However, it is unknown how the cyanophage PstS  
30 interplays with the host PstC and PstA to function as a chimeric ABC transporter. Here we  
31 showed that the cyanophage P-SSM2 PstS protein was abundant in the infected  
32 *Prochlorococcus* NATL2A cells and the host phosphate uptake rate was enhanced after  
33 infection. This is consistent with our biochemical and structural analyses showing that the  
34 phage PstS protein is indeed a high-affinity phosphate-binding protein. We further modeled  
35 the complex structure of phage PstS with host PstCA and revealed three putative interfaces  
36 that may facilitate the formation of the chimeric ABC transporter. Our results provide  
37 insights into the molecular mechanism by which cyanophages enhance the phosphate uptake  
38 rate of cyanobacteria. Phosphate acquisition by infected bacteria can increase the phosphorus  
39 contents of released cellular debris and virus particles, which together constitute a significant  
40 proportion of the marine dissolved organic phosphorus pool.

## 41 **Introduction**

42       The unicellular picocyanobacterium *Prochlorococcus* is the dominant phytoplankton in  
43 tropical and subtropical oligotrophic oceans (Partensky et al., 1999; Scanlan et al., 2009),  
44 where phosphate concentrations are in the nanomolar range and can limit primary production  
45 (Wu et al., 2000; Thingstad et al., 2005). *Prochlorococcus* has evolved several mechanisms  
46 to reduce its cellular phosphorus (P) content, including substituting non-phosphorus lipids for  
47 phospholipids (Van Mooy et al., 2006; Van Mooy et al., 2009). *Prochlorococcus* maintains  
48 an extracellular buffer of labile phosphate as a phosphate reserve to support its growth  
49 (Zubkov et al., 2015). A proton motive force is required for the import of phosphate across  
50 the outer membrane into the periplasm (Kamennaya et al., 2020). To import phosphate from  
51 the periplasm into the cytoplasm, *Prochlorococcus* cells use the high-affinity phosphate-  
52 specific transport system (Pst) and do not encode low-affinity phosphate transporters (Moore  
53 et al., 2005; Scanlan et al., 2009). The Pst system has been extensively studied in *Escherichia*  
54 *coli* (Lamarche et al., 2008). This ABC-type phosphate transporter comprises the periplasmic  
55 high-affinity phosphate-binding protein PstS, a channel formed by two transmembrane  
56 proteins PstC and PstA, and the intracellular homodimeric ATPase PstB (Lamarche et al.,  
57 2008; Hsieh and Wanner, 2010). In response to P limitation, the PhoR/PhoB two-component  
58 signal transduction system upregulates the transcription of phosphate-acquisition genes  
59 (Nagaya et al., 1994; Suzuki et al., 2004; Tetu et al., 2009). Consistent with the upregulation  
60 of phosphate-acquisition genes (Martiny et al., 2006; Reistetter et al., 2013), the  
61 *Prochlorococcus* strain MED4 was shown to increase its maximum uptake velocity of  
62 phosphate under P-limited conditions (Krumhardt et al., 2013). *Prochlorococcus* field  
63 populations also show enhanced phosphate uptake velocities in oceanic regions with low  
64 phosphate concentrations (Lomas et al., 2014).

65 Phosphate-acquisition genes have been found in the genomes of viruses (cyanophages)  
66 that infect *Prochlorococcus* and its closely related sister group marine *Synechococcus*  
67 (Sullivan et al., 2005; Sullivan et al., 2010). As lytic double-stranded DNA viruses,  
68 cyanophages comprise three morphotypes (Sullivan et al., 2003; Sabehi et al., 2012): T4-like  
69 and TIM5-like cyanomyoviruses, T7-like cyanopodoviruses, and cyanosiphoviruses. Among  
70 the 77 publically available cyanomyovirus genomes in the NCBI database (as of August  
71 2019), 24 carry *pstS* and three carry *phoA*, an putative alkaline phosphatase gene. Due to a  
72 significant phosphorus demand for a higher nucleic acid to protein ratio, cyanophages were  
73 found to possess phosphate-acquisition genes (Jover et al., 2014). Indeed, metagenomic  
74 analysis revealed that the frequencies of P-acquisition genes in the genomes of wild  
75 cyanomyoviruses are negatively correlated with the phosphate concentrations of the marine  
76 habitats (Kelly et al., 2013), which was also found in *Prochlorococcus* genomes (Martiny et  
77 al., 2006; Martiny et al., 2009; Coleman and Chisholm, 2010).

78 Our previous study found that *pstS* and *phoA* genes of cyanophage S-SM1 were  
79 upregulated during infection under P-limited conditions, and their expression was controlled  
80 by the host's PhoR/PhoB system (Zeng and Chisholm, 2012). Using cyanophage P-SSM2  
81 that contains *pstS* but not *phoA*, the transcriptomic analysis further showed that *pstS* and the  
82 adjacent gene *g247* (with unknown function) were the only two phage genes that were  
83 upregulated when *Prochlorococcus* NATL2A was infected under P-limited conditions (Lin et  
84 al., 2016). Furthermore, we discovered that under P-limited conditions the host *pstS*  
85 transcripts per cell decreased after infection, whereas the phage *pstS* transcripts were much  
86 more abundant than the host copies, resulting in more *pstS* transcripts (host and phage  
87 combined) in the infected cells (Lin et al., 2016). However, it remains unknown whether  
88 phage PstS proteins are synthesized during infection to increase the phosphate uptake rate of  
89 infected *Prochlorococcus* cells.

90 Here, we investigate how the cyanophage PstS protein is integrated into the phosphate  
91 acquisition system of the cyanobacterial host. Using cyanophage P-SSM2 and  
92 *Prochlorococcus* NATL2A that we have studied previously (Zeng and Chisholm, 2012; Lin  
93 et al., 2016), we compared the phosphate-binding affinities of both phage and host PstS  
94 proteins, and then measured the PstS protein abundances during infection. We also compared  
95 phosphate uptake rates of infected and uninfected *Prochlorococcus* cells. To elucidate the  
96 molecular mechanism by which the phage PstS protein binds phosphate, we solved the crystal  
97 structures of cyanophage PstS proteins. Furthermore, modeling of cyanophage PstS binding  
98 to cyanobacterial PstCA predicted several essential residues for forming a chimeric ABC  
99 transporter.

100

## 101 **Results**

### 102 **Phosphate-binding affinities of *Prochlorococcus* and cyanophage PstS proteins**

103 To compare the phosphate-binding affinities of PstS proteins encoded by  
104 *Prochlorococcus* NATL2A and cyanophage P-SSM2, we cloned their genes in *E. coli* and  
105 purified the recombinant PstS proteins (Supplementary Figure 1A). The binding coefficient  
106 of PstS to phosphate (the ratio of phosphate-bound PstS to the total PstS protein) showed a  
107 typical hyperbolic relationship with phosphate concentration (Figure 1A). The maximum  
108 binding coefficients ( $B_{max}$ ) for host and phage PstS proteins were  $0.71 \pm 0.38$  and  $1.12 \pm 0.14$ ,  
109 respectively. This suggested that one PstS protein binds to one phosphate molecule, which is  
110 consistent with the stoichiometry of the *E. coli* PstS protein ( $B_{max} = 0.90$ ) (Medveczky and  
111 Rosenberg, 1970; Luecke and Quioco, 1990). The  $B_{max}$  values of PstS proteins could be  
112 affected by the ratios of different structural conformations, with the open conformation  
113 suitable for accepting phosphate while the close conformation inaccessible to phosphate  
114 (Brautigam et al., 2014). The dissociation constants ( $K_d$ ) of the host and phage PstS proteins

115 were  $0.82 \pm 0.44$  and  $1.39 \pm 0.22$   $\mu\text{M}$ , respectively, which are comparable to those of *E. coli*  
116 ( $0.8$   $\mu\text{M}$ ) and *Pseudomonas aeruginosa* ( $0.34$   $\mu\text{M}$ ) (Medveczky and Rosenberg, 1970; Poole  
117 and Hancock, 1984). Interestingly, the  $K_d$  value of phage PstS was significantly higher than  
118 that of the host PstS (Figure 1B), indicating that the phage PstS has a relatively lower  
119 phosphate-binding affinity than the host PstS. Similarly, both cyanophages and cyanobacteria  
120 encode transaldolase genes, and the cyanophage enzymes are less efficient than the host  
121 enzymes (Thompson et al., 2011).

122

### 123 **Host and phage PstS protein abundances during infection under P-limited conditions**

124 We used specific antibodies (Supplementary Figure 1) to detect the host PstS protein in  
125 the uninfected cells. Similar to our previous studies (Zeng and Chisholm, 2012; Lin et al.,  
126 2016), from 24 h after resuspension in P-limited growth medium, *Prochlorococcus* NATL2A  
127 cells grew slower than those in the nutrient-replete medium (Figure 2A). Both gel  
128 electrophoresis and western blot analyses showed that the PstS protein abundance gradually  
129 increased during the progression of P limitation, while it was undetectable under nutrient-  
130 replete conditions (Supplementary Figure 2). The results are consistent with the changes of  
131 PstS protein abundances in response to P limitation in *Prochlorococcus* MED4 (Fuszard et al.,  
132 2010), *Synechococcus* WH7803 (Scanlan et al., 1993), and *Synechococcus* WH8102  
133 (Ostrowski et al., 2010; Cox and Saito, 2013).

134 To measure the abundances of host and phage PstS proteins, we infected  
135 *Prochlorococcus* NATL2A with cyanophage P-SSM2 (phage/host ratio = 3) at 24 h of P  
136 limitation when the host PstS protein had been highly induced (Supplementary Figure 2).  
137 Consistent with previous studies (Zeng and Chisholm, 2012; Lin et al., 2016), progeny  
138 phages were released after 8 h of infection and fewer phages were produced under P-limited  
139 conditions than those under nutrient-replete conditions (Figure 2B). Using quantitative

140 western blotting (Figure 2C, Supplementary Figure 3), we found that under P-limited  
141 conditions the uninfected cultures had an average of  $48,480 \pm 6,393$  PstS protein molecules  
142 per cell, which is comparable to that of *E. coli* (Medveczky and Rosenberg, 1970). During  
143 infection under P-limited conditions, the host PstS protein abundance decreased significantly  
144 by 35% at 2 h and decreased by 10% at 6 h (Figure 2D). The phage PstS protein was barely  
145 detected at 2 h after infection (Figure 2C), but increased at 6 h to 81% of the host PstS  
146 abundance in the uninfected cultures (Figure 2E). Our previous work showed that the host  
147 *pstS* transcripts decreased by 74% at 6 h after infection under P-limited conditions and the  
148 phage *pstS* transcripts were ~5-fold higher than the host *pstS* transcripts in the uninfected  
149 cultures (Lin et al., 2016). Thus, the trends of PstS protein abundances were consistent with  
150 the transcript abundances, but with smaller changes. The variations of the transcript  
151 abundance and protein abundance of the same gene might result from translational efficiency  
152 and/or different turnover times of protein and RNA (de Sousa Abreu et al., 2009;  
153 Schwanhausser et al., 2011). Nevertheless, as a result of the high expression level of phage  
154 PstS proteins, the total PstS proteins were 71% more abundant than those in the uninfected  
155 cultures (Figure 2F).

156

### 157 **Phosphate uptake kinetics of *Prochlorococcus* after phage infection**

158 Having shown that cyanophage-encoded PstS protein can bind phosphate and was  
159 expressed during infection, we wondered whether cyanophage infection affects the phosphate  
160 uptake kinetics of *Prochlorococcus* cells. We used an established  $^{32}\text{P}$  tracer method (see  
161 Materials and Methods) that has been used to measure the intracellular phosphate uptake of  
162 *Prochlorococcus* MED4 (Krumhardt et al., 2013). The phosphate uptake velocity forms a  
163 hyperbolic relationship with phosphate concentration (Supplementary Figure 4A), which is  
164 similar to a classical Michaelis-Menten curve for enzyme kinetics (Krumhardt et al., 2013).

165 Without cyanophage infection, the maximum phosphate uptake velocity ( $V_{\max}$ ) of  
166 *Prochlorococcus* NATL2A was  $0.545 \pm 0.096$  amol phosphate cell<sup>-1</sup> h<sup>-1</sup> under nutrient-  
167 replete conditions and increased to  $1.354 \pm 0.331$  amol phosphate cell<sup>-1</sup> h<sup>-1</sup> under P-limited  
168 conditions (Supplementary Figure 4B), which are comparable to those of *Prochlorococcus*  
169 MED4 (Krumhardt et al., 2013). The increase of  $V_{\max}$  under P-limited conditions is consistent  
170 with the increase of PstS protein abundance (Supplementary Figure 2). The Michaelis-  
171 Menten constant ( $K_M$ ) of *Prochlorococcus* NATL2A was  $0.357 \pm 0.110$   $\mu$ M under nutrient-  
172 replete conditions and remained unchanged under P-limited conditions (Supplementary  
173 Figure 4C), which is within the  $K_M$  range of *Prochlorococcus* MED4 cells (Krumhardt et al.,  
174 2013).

175 At 6 h after infection by cyanophage P-SSM2 under P-limited conditions (Figure 3A,  
176 Supplementary Figure 4B),  $V_{\max}$  of *Prochlorococcus* NATL2A cells increased by 57% to  
177 2.05 amol phosphate cell<sup>-1</sup> h<sup>-1</sup>, which is consistent with the higher amount of total PstS  
178 proteins at 6 h after infection (Figure 2F). Curiously, the phosphate uptake rate of infected  
179 cells did not decrease at 2 h (Figure 3A), although less PstS proteins were present (Figure  
180 2D), suggesting that other proteins might function to maintain the host phosphate uptake.  
181 Because *g247* and *pstS* were the only two genes in cyanophage P-SSM2 genome that were  
182 upregulated under P-limited conditions (Lin et al., 2016), it is plausible that gp247 might play  
183 a role in phosphate acquisition during infection. A BLASTP search using gp247 protein  
184 sequence as the query did not identify any protein of known function, but two iterations of  
185 PSI-BLAST search identified several porin proteins from *Vibrio breoganii* (E value  $\sim 10^{-6}$  and  
186 identity  $\sim 30\%$ ). To test whether gp247 can form a porin structure, we predicted its 3D model  
187 using two different servers. The AI-predicted models by tFold showed a clear transporter  
188 structure formed by beta-strands (Supplementary Figure 5A). The structures predicated by the  
189 Phyre2 server also showed clear beta-strands structures, which could form a porin-like



190 transporter in a homo-oligomeric organization (Supplementary Figure 5B). In gram-negative  
191 bacteria, porin genes have been found to be upregulated during P limitation and the expressed  
192 porins form  $\beta$ -barrels in the outer membrane to facilitate phosphate transport into the  
193 periplasm (Modi et al., 2015). The PstS protein can then bind phosphate and transport it  
194 across the periplasm membrane into the cytosol. Although the phage PstS protein has a  
195 higher  $K_d$  than that of the host PstS protein (Figure 1B), we did not detect significant changes  
196 of  $K_M$  after cyanophage infection, probably due to the systematic errors of this measurement  
197 (Figure 3B). Nevertheless, our results suggested that cyanophage-encoded PstS protein can  
198 enhance the host's phosphate uptake rate during infection.

199

## 200 **Structure of a cyanophage PstS protein**

201 Currently, several structures of PstS proteins from heterotrophic bacteria have been  
202 determined (Luecke and Quioco, 1990; Elias et al., 2012), but PstS structures of  
203 cyanobacteria and cyanophages have not been solved. To determine how PstS binds  
204 phosphate, we solved the PstS structure of cyanophage P-SSM2 at 2.25 Å resolution. To the  
205 best of our knowledge, the cyanophage PstS structure represented the first viral structure of a  
206 substrate-binding protein of an ABC-transporter. The P-SSM2 PstS structure harbors a  
207 typical “Venus flytrap” fold that is composed of two globular  $\alpha/\beta$  domains held together by  
208 two  $\beta$ -strands (Supplementary Figure 6A). Each  $\alpha/\beta$  domain contains a central mixed five-  
209 stranded  $\beta$ -sheet and four or five  $\alpha$ -helices packing against the center (Supplementary Figure  
210 6A). Similar to *E. coli* PstS (Luecke and Quioco, 1990), one phosphate molecule binds to  
211 the cleft between the two  $\alpha/\beta$  domains (Supplementary Figure 6A). Moreover, the phosphate-  
212 binding residues Ser30, Ser59, Asp77, Arg146, Asp148, and Ser150 (Supplementary Figure  
213 6B) are highly conserved among the PstS proteins with solved structures (Supplementary  
214 Figure 7).

215

## 216 **Modeling the interactions between cyanophage PstS and host PstCA**

217 To be functional in the infected host cells, the cyanophage PstS protein needs to  
218 interact with the host PstC and PstA proteins to form a chimeric ABC transporter for  
219 phosphate uptake, since cyanophage genomes do not contain *pstC* and *pstA* genes. To  
220 investigate the interaction surface of PstS with the transmembrane PstCA complex, we tried  
221 to express and purify *Prochlorococcus* PstC and PstA proteins in *E. coli*, but could not obtain  
222 soluble proteins. Hence, we simulated the PstCA structure of *Prochlorococcus* NATL2A and  
223 docked P-SSM2 PstS onto the host PstCA complex (see Materials and Methods). Our  
224 simulated model showed that the phage PstS positions above the extracellular face of PstCA  
225 with its phosphate-binding pocket facing towards PstCA (Figure 4A). PstS interacts with the  
226 host PstCA complex mainly via three interfaces, an  $\alpha$ -helix  $\alpha 2$  (interface 1), a  $\eta$ -helix  $\eta 1$  and  
227 flanking loops (interface 2), and a loop  $L_{\alpha 4-\beta 7}$  (interface 3) (Figure 4A). Detailed analysis  
228 showed that Ser61, Lys64 and Asp68 of interface 1, Lys87 of interface 2, and Thr171,  
229 Lys173, and Ala176 of interface 3 contribute to the major polar interactions with PstCA  
230 (Figure 4B). Specifically, the interface 1 interacts with Phe163, Asn255, Asn256 and Glu278  
231 of PstC, and the interface 2 interacts with Glu143 and Arg147 of PstC and Glu263 of PstA  
232 (Figure 4B). In addition, the interface 3 interacts with Tyr258, Asn259, and Tyr265 of PstA  
233 (Figure 4B). Therefore, our results suggested that the phage PstS protein can interact with the  
234 host PstCA complex to form a chimeric ABC transporter, which provides a molecular  
235 mechanism by which cyanophage infection enhances the phosphate uptake rate of  
236 cyanobacteria (Figure 3A).

237

## 238 **Two groups of cyanophage PstS proteins with different interface sequences**

239 To investigate whether the three interface sequences are conserved in cyanophage PstS  
240 proteins, we built a maximum-likelihood phylogenetic tree using the PstS protein sequences  
241 from the currently available cyanophage genomes, together with their host PstS sequences.  
242 Based on the tree, we grouped the PstS sequences into four groups, termed I, II, III, and SphX  
243 (Figure 5). The group I PstS contained *Prochlorococcus*, *Synechococcus*, and cyanophage  
244 sequences, each forming a separate clade (Figure 5A). PstS of cyanophage P-SSM2 is in the  
245 cyanophage clade of group I PstS sequences. The group II PstS contained cyanophage  
246 sequences and the group III PstS contained *Synechococcus* sequences (Figure 5A). The SphX  
247 group contained *Synechococcus* sequences that are closely related to the phosphate-binding  
248 protein SphX of the freshwater cyanobacterium *Synechococcus* PCC7942 (Scanlan et al.,  
249 2009) (Figure 5). Group I cyanophage PstS sequences fell into a phylogenetic clade within  
250 cyanobacterial sequences, while group II cyanophage sequences formed a distinct clade  
251 (Figure 5A), suggesting that cyanophages might have gained the *pstS* gene from their  
252 cyanobacterial hosts in at least two separate evolutionary events. Sequence alignment showed  
253 that the three interface regions of P-SSM2 PstS are highly conserved among group I PstS  
254 sequences, but are quite different from the corresponding regions in the groups II, III and  
255 SphX sequences (Figure 5B). Since the host PstC and PstA residues that interact with the  
256 group I PstS of cyanophage P-SSM2 are highly conserved in the sequenced *Prochlorococcus*  
257 and *Synechococcus* genomes (Supplementary Figure 8) (see Discussion), the group II  
258 cyanophage PstS proteins may interact with the host PstCA complex in a different way  
259 compared to the group I PstS proteins.

260 To explore how the group II cyanophage PstS protein interacts with the host PstCA  
261 complex, we solved the crystal structure of a group II PstS protein from cyanophage Syn19 at  
262 1.70 Å resolution (Supplementary Figure 9B). The P-SSM2 and Syn19 PstS proteins share a  
263 high structural similarity to each other with a root-mean square deviation (RMSD) value of

264 0.80 Å over 255 C $\alpha$  atoms (Supplementary Figure 9D). We then simulated the PstCA  
265 structure of *Synechococcus* WH8102, which is the original host of Syn19, and docked Syn19  
266 PstS onto the host PstCA complex (Figure 4C). Compared with the interaction model of P-  
267 SSM2 PstS and *Prochlorococcus* NATL2A PstCA (Figure 4A), Syn19 PstS also harbors  
268 three interfaces that are structurally similar to those of P-SSM2 PstS (Supplementary Figure  
269 9D). However, when the PstCA structures of *Prochlorococcus* NATL2A and *Synechococcus*  
270 WH8102 were superimposed, the Syn19 PstS shows a ~180° rotation as compared to P-  
271 SSM2 PstS (compare Figures 4A and 4C). As a result, the interfaces 1 and 2 of Syn19  
272 interact with WH8102 PstA whereas the interface 3 binds to WH8102 PstC (Figure 4C). On  
273 the contrary, the interfaces 1 and 2 of P-SSM2 PstS interact with NATL2A PstC, and the  
274 interface 3 binds to NATL2A PstA (Figure 4A). The residues Arg70 of interface 1, Ser89,  
275 Lys90, Glu94 of interface 2, and Lys172 and Thr174 of interface 3 contribute to the  
276 interaction with WH8102 PstCA (Figure 4D). Sequence alignment showed that most of the  
277 interface residues are conserved among group II cyanophage PstS proteins (Figure 5B).  
278 Taken together, our results suggested that both group I and II cyanophage PstS proteins could  
279 recognize the host PstCA complex to organize into a functional phosphate transporter that  
280 enhances the phosphate uptake rate of infected host cells.

281

## 282 **Discussion**

283 In this study, we showed that the cyanophage P-SSM2 PstS protein is a functional  
284 phosphate-binding protein and is abundantly expressed during infection under P-limited  
285 conditions, resulting in more PstS proteins in the infected cultures than in the uninfected  
286 cultures. Consistently, the maximum phosphate uptake velocity of infected *Prochlorococcus*  
287 NATL2A cultures was higher than that of the uninfected cultures. The high-resolution crystal  
288 structures of cyanophage PstS proteins revealed key phosphate-binding residues that are

289 conserved in bacterial and cyanophage PstS proteins. By docking the cyanophage PstS  
290 structure onto the simulated structure of the host PstCA complex, we were able to predict  
291 essential residues for the interaction of cyanophage PstS with the host PstCA complex,  
292 suggesting the formation of chimeric ABC transporters in the infected host cells. By using a  
293 combination of enzymatic, biochemical, and structural analyses, our work provides molecular  
294 mechanisms by which cyanophage PstS protein is integrated into the phosphate uptake  
295 system of the cyanobacterial host cells.

296 The phosphate ABC transporter is composed of PstS, the transmembrane channel  
297 proteins PstC and PstA, and the ATPase PstB (Lamarche et al., 2008; Hsieh and Wanner,  
298 2010), but the currently available cyanophage genomes only contain the *pstS* gene, lacking  
299 the other three components. For ABC transporters to achieve maximal import activity,  
300 mathematic models indicate that the concentrations of substrate-binding proteins (e.g., PstS)  
301 should be higher than those of the transporters and substrates (Bosdriesz et al., 2015). A  
302 higher concentration of the substrate-binding protein increases the encounter rate of the  
303 transporter with the substrate and thus increases the substrate uptake rate of the transporter  
304 (Ames and Lever, 1970; Bosdriesz et al., 2015). Therefore, PstS protein abundance is the  
305 rate-limiting step for phosphate uptake and this may explain why cyanophages express  
306 additional PstS proteins during infection (Figure 2E). Enhancing the phosphate uptake  
307 velocity of infected host cells (Figure 3A) can fulfil the high phosphorus demand of  
308 cyanophages (Jover et al., 2014), which may confer cyanophages a selective advantage under  
309 P-limited oceanic regions (Kelly et al., 2013).

310 Our phylogenetic analysis identified four groups of PstS proteins in  
311 cyanobacterial/cyanophage genomes. *Prochlorococcus* and marine *Synechococcus* genomes  
312 all contain at least one copy of the group I *pstS* gene, and some contain additional *pstS/sphX*  
313 genes (Figure 5A). For example, the genome of *Synechococcus* sp. WH8102 encodes two

314 group I *pstS* genes, one group III *pstS* gene, and one *sphX* gene (Figure 5A). It was  
315 hypothesized that different *pstS/sphX* genes may encode proteins with different phosphate-  
316 binding affinities that could be used in different environmental conditions (Scanlan et al.,  
317 2009). Despite multiple *pstS/sphX* genes, each cyanobacterial genome only encodes one *pstA*  
318 gene and one *pstC* gene (Martiny et al., 2006). Therefore, different PstS/SphX proteins in a  
319 cyanobacterial cell should be able to interact with the same PstCA complex. Indeed, our  
320 structural simulations suggested that both groups I and II cyanophage PstS proteins are able  
321 to interact with the host PstCA complex, although using different interface residues (Figure 4)  
322 that are conserved within each group (Figure 5B). Future site-directed mutagenesis and  
323 structural analysis are needed to verify the interface residues we predicted in this study.

324 Nutrient acquisition by infected cells affects the elemental stoichiometry of released  
325 materials after cell lysis (Jover et al., 2014). The dissolved organic phosphorus (DOP)  
326 released after infection comprises cellular debris and virus particles, the total amount of  
327 which depends on both the phosphorus content of uninfected host cells and the newly  
328 acquired phosphorus during infection. We showed that the maximum phosphate uptake  
329 velocity of infected *Prochlorococcus* cells increased by 57% at 6 h after infection (Figure  
330 3A), indicating that more phosphate is acquired by the infected cells and thus more DOP  
331 should be released after infection. Marine virus particles have been estimated to  
332 constitute >5% of the total DOP pool in the surface waters of several oceanic regions (Jover  
333 et al., 2014) and cellular debris should constitute an even large proportion in the marine DOP  
334 pool. Thus, by manipulating the host phosphate ABC transporter system, cyanophages have  
335 the potential to affect phosphorus cycling in the oceans.

336

337

## 338 **Acknowledgements**

339 This study is supported by grants to Qinglu Zeng from the Hong Kong Branch of Southern  
340 Marine Science and Engineering Guangdong Laboratory (Guangzhou) (Project numbers  
341 SMSEGL20SC01 and GML2019ZD0409). We thank Haiwei Luo for helpful discussion.

342

## 343 **Author Contributions**

344 Conceptualization, Q.Z.; Methodology, Q.Z., F.Z., X.L., K.C., Y.J., T.N., and C-Z.Z.; Formal  
345 analysis, X.L., Y.J, Y.C., and F.Z.; Investigation, Q.Z., F.Z., X.L., K.C., Y.J., T.N, Y.C., J.F.,  
346 S.D., C-Z.Z.; Writing – Original Draft, Q.Z., X.L., Y.J., F.Z.; Writing – Review & Editing,  
347 all authors.

348

## 349 **Competing Interests statement**

350 The authors declare that there is no conflict of interest.

351

## 352 **Materials and methods**

### 353 **Expression and purification of recombinant PstS proteins**

354 The *pstS* genes of *Prochlorococcus* NATL2A, cyanophage P-SSM2, and cyanophage  
355 Syn19 were amplified by PCR using primers listed in Supplementary Table 1. PCR products  
356 were cloned into the pET-22b vector, and then transformed into *Escherichia coli* BL21 (DE3)  
357 cells harboring the pKY206 plasmid. *E. coli* cells were grown in 1 L LB medium (10 g Bacto  
358 tryptone, 10 g NaCl, and 5 g yeast extract per liter) with 50  $\mu\text{g ml}^{-1}$  ampicillin and 5  $\mu\text{g ml}^{-1}$   
359 tetracycline at 37°C for 5 h until  $\text{OD}_{600} = 0.8$ . Recombinant proteins with an C-terminal  
360 hexahistidine tag were induced with 0.2 mM IPTG (isopropyl  $\beta$ -D-1-thiogalactopyranoside)  
361 for 20 h at 16°C. *E. coli* cells were harvested by centrifugation at 8,000 g for 10 min and  
362 resuspended in the lysis buffer (20 mM Tris-HCl, 200 mM NaCl, 5% glycerol, 5 mM sodium  
363 phosphate, pH 7.5). After sonication for 30 min, the cultures were spun down at 12,000 g for  
364 30 min and the supernatants were loaded onto a His-Select Nickel Affinity gel (GE  
365 Healthcare). Recombinant PstS proteins were eluted with the elution buffer (500 mM  
366 imidazole, 20 mM Tris-HCl, 200 mM NaCl, 5% glycerol, 5 mM sodium phosphate, pH 7.5)  
367 and then further purified using HiLoad 16/60 Superdex 200 columns (GE Healthcare). For  
368 crystallization, PstS proteins with bound phosphate substrates were purified using HiLoad  
369 16/60 Superdex 200 columns pre-equilibrated with 20 mM Tris-HCl, 200 mM NaCl, 5%  
370 glycerol, 5 mM sodium phosphate, 14 mM  $\beta$ -mercaptoethanol, pH 7.5. For phosphate binding  
371 affinity assays, PstS proteins without bound phosphate substrates were purified using  
372 columns pre-equilibrated with 20 mM Tris-HCl, 200 mM NaCl, 5% glycerol, pH 7.5.

373

### 374 **Measurement of phosphate-binding affinity of recombinant PstS proteins**

375 Prior to the measurement of phosphate-binding affinity, we removed the residual  
376 phosphate substrates from the purified PstS proteins by dialyzing in the Tris buffer (20 mM



377 Tris-HCl, 200 mM NaCl, pH 7.5) at 4°C for 24 h using the Slide-A-Lyzer mini dialysis  
378 devices (20K MWCO, Thermo Fisher Scientific). After dialysis, protein concentrations were  
379 measured using the DC Protein Assay Kit (Bio-Rad) with BSA (bovine serum albumin) as  
380 standards.

381 Equilibrium dialysis was performed to determine the dissociation constant ( $K_d$ ) of the  
382 recombinant PstS proteins (Poole and Hancock, 1984). In each Slide-A-Lyzer mini dialysis  
383 unit (20K), 4 µg protein was placed in the top dialysis chamber, and Tris buffer containing  
384 trace amount of  $^{32}\text{P}$ -labeled orthophosphoric acid (~1.2 pmol and ~1 µCi, PerkinElmer) and  
385 different concentrations of cold phosphate ( $\text{NaH}_2\text{PO}_4$ ) was placed in the bottom dialysis  
386 buffer chamber. After shaking for 24 h at room temperature, 100 µl samples were taken from  
387 the dialysis chamber and the dialysis buffer chamber, respectively. Radioactivity was  
388 measured by adding the samples into 4 ml liquid scintillation cocktail (OptiphaseHiSafe 3,  
389 PerkinElmer) and counting with a liquid scintillation counter (Wallac Win Spectral 1414,  
390 PerkinElmer). The dissociation constant  $K_d$  was determined using the following equation  
391 (Michaelis et al., 2011; Viaene et al., 2013):

$$392 \quad B = \frac{B_{\max} * [L]}{[L] + K_d}$$

393 where  $B$  is the binding coefficient,  $B_{\max}$  is the maximum binding coefficient, and  $L$  is the  
394 concentration of free phosphate. Non-linear regression fitting was performed using SigmaPlot  
395 v12.5 (Systat Software).

396

### 397 **Infection of *Prochlorococcus* NATL2A by cyanophage P-SSM2**

398 Infection of *Prochlorococcus* NATL2A by cyanophage P-SSM2 under P-limited  
399 conditions was carried out as we described previously (Zeng and Chisholm, 2012; Lin et al.,  
400 2016). The axenic *Prochlorococcus* NATL2A culture was maintained at 24°C under constant

401 cool white light ( $\sim 30 \mu\text{E m}^{-2} \text{s}^{-1}$ ) in the Pro99 growth medium (Moore et al., 2002) that is  
402 based on Port Shelter seawater from Hong Kong. Fresh cyanophage P-SSM2 lysate was  
403 concentrated with Amicon Ultra-15 30K Centrifugal Filter Units (Millipore) at 3,000 g for 15  
404 min, washed twice with sterile seawater, and resuspended in the same medium. Prior to  
405 infection, mid-log *Prochlorococcus* NATL2A cultures were centrifuged at 10,000 g for 15  
406 min at 21°C, washed with the nutrient-replete Pro99 medium (with 50  $\mu\text{M}$  phosphate) or the  
407 P-depleted Pro99 medium (without added phosphate), and resuspended in the same media.  
408 After 24 h of resuspension, *Prochlorococcus* NATL2A cells were mixed with cyanophage P-  
409 SSM2 at a phage/host ratio of 3. Cell numbers were measured by flow cytometry (BD  
410 FACSCalibur, BD Biosciences). Extracellular phages were measured by quantitative PCR  
411 using primers for *g20* (Supplementary Table 1).

412

### 413 **Quantification of host and phage PstS proteins using specific antibodies**

414 The purified recombinant PstS proteins of *Prochlorococcus* NATL2A and cyanophage  
415 P-SSM2 were used as antigens to generate antibodies (Antibody host: rabbit; custom ordered  
416 from MW Biotech). The specificity of antibodies was confirmed using recombinant PstS  
417 proteins (Supplementary Figure 1) and *Prochlorococcus* NATL2A cells (Figure 2C).

418 To detect PstS proteins by western blot, purified proteins or total proteins of  
419 *Prochlorococcus* cultures were denatured at 95°C for 15 min in the loading buffer (62.5 mM  
420 Tris-Cl, pH 6.8, 2% SDS, 0.05% bromophenol blue, 1% glycerol, and 0.05%  $\beta$ -  
421 mercaptoethanol). Denatured proteins were separated on a 12% SDS-PAGE gel, stained with  
422 Coomassie Blue, and visualized with the ChemiDoc Imaging System (Bio-Rad). For western  
423 blotting, proteins were transferred from the SDS-PAGE gel (without staining) onto a PVDF  
424 membrane and probed with primary antibodies against *Prochlorococcus* NATL2A PstS or  
425 cyanophage P-SSM2 PstS. The membrane was then incubated with an HRP-conjugated

426 secondary antibody (ECL anti-rabbit IgG, GE Healthcare) and PstS bands were visualized  
427 with the ChemiDoc Imaging System (Bio-Rad).

428 For absolute quantification of PstS proteins in *Prochlorococcus* NATL2A cells, total  
429 proteins from  $10^8$  cells were separated on 12% SDS-PAGE alongside serial dilutions of  
430 purified recombinant PstS proteins with known amounts. Proteins were then transferred to a  
431 PVDF membrane for western blot analysis using PstS antibodies (Figure 2C). A standard  
432 curve was generated using the signal volume of recombinant PstS bands and the  
433 corresponding protein amounts (Supplementary Figure 3A). Based on the standard curve, the  
434 average number of PstS protein molecules per cell was calculated (Supplementary Figure 3B).

435

#### 436 **Phosphate uptake kinetics of *Prochlorococcus* cells**

437 Phosphate uptake kinetics of *Prochlorococcus* NATL2A cells was measured following  
438 an established method that has been used for *Prochlorococcus* MED4 (Krumhardt et al.,  
439 2013). Briefly, 12 ml culture was centrifuged at 10,000 g for 15 min at 21°C and resuspended  
440 with the same volume of the Pro99 medium without addition of phosphate. After  
441 resuspension, aliquots of 1 ml cultures were transferred to clear Eppendorf tubes, which  
442 contained trace amount of  $^{32}\text{P}$ -labeled orthophosphoric acid ( $\sim 1 \mu\text{Ci}$ , Perkin Elmer) and  
443 different concentrations of cold  $\text{PO}_4$  (from  $0.02 \mu\text{M}$  to  $20 \mu\text{M}$ ). Cultures were incubated for  
444 60 min at 24°C at a light level of  $\sim 30 \mu\text{E m}^{-2} \text{s}^{-1}$  to allow linear uptake of phosphate  
445 (Supplementary Figure 10). Cultures were then filtered at a vacuum pressure of  $\sim 100 \text{ mm Hg}$   
446 through a  $0.22 \mu\text{m}$  polycarbonate filter that was supported by a Whatman GF/F filter. Prior to  
447 filtration, the filters were pre-soaked with the Pro99 medium amended with  $0.5 \text{ mM PO}_4$  to  
448 minimize non-specific adhesion of  $^{32}\text{P}$  on to the filters. After filtration, the filters were soaked  
449 in a basic oxalate reagent for 10 min and dried by filtration for 30 sec. Since oxalate removes  
450 the extracellular phosphate buffer of cyanobacterial cells (Zubkov et al., 2015), the remaining

451  $^{32}\text{P}$  reflected intracellular phosphate uptake by *Prochlorococcus* cells. The filters were  
452 immersed into 4 ml liquid scintillation cocktail (Optiphase HiSafe 3, Perkin Elmer) and the  
453 radioactivity of each filter was measured by a liquid scintillation counter (Wallac Win  
454 Spectral 1414, PerkinElmer). A filter without any cells was measured as a blank control to  
455 reflect the background  $^{32}\text{P}$  level.

456 The phosphate uptake velocity ( $V$ ) of *Prochlorococcus* NATL2A was determined by the  
457 following equation (Fu et al., 2005; Krumhardt et al., 2013):

$$458 \quad V = [P(R_f - R_b)] / (R_t t c v)$$

459 where  $R_f$  is the  $^{32}\text{P}$  radioactivity on the filters with cells,  $R_b$  denotes the radioactivity on the  
460 blank control filter without cells, and  $R_t$  is the total radioactivity in the 1 ml culture.  $P$  is the  
461 concentration of cold  $\text{PO}_4$  (amol per liter), while  $t$ ,  $c$  and  $v$  represents incubation time (h), cell  
462 concentration (cells per liter) and volume of the filtered culture (liter), respectively. The  
463 velocity ( $\text{amol cell}^{-1} \text{h}^{-1}$ ) was plotted against cold phosphate concentration and the curve was  
464 fitted to the Michaelis-Menten equation:

$$465 \quad V = (V_{\max} * P) / (K_M + P)$$

466 where  $V_{\max}$  represents the maximum velocity of phosphate uptake and  $K_M$  represents the  
467 Michaelis-Menten constant. The non-linear regression was performed on SigmaPlotv12.5  
468 (Systat Software, USA).

469

#### 470 **Crystallization of PstS with phosphate**

471 Fractions containing the target protein were pooled and concentrated to  $8 \text{ mg ml}^{-1}$  for  
472 crystallization. Crystals were grown by mixing the protein sample with the reservoir solution  
473 at a 1:1 ratio in hanging drops at  $13^\circ\text{C}$ . The crystallization buffer was composed of 20 mM

474 Tris-HCl, pH 7.5, 200 mM NaCl, 5% glycerol, 5 mM sodium phosphate buffer, pH 7.5, 1  
475 mM DTT. Crystals of PstS from P-SSM2 appeared in the condition containing 25% (w/v)  
476 polyethylene glycol 3350, 0.1 M citric acid, pH 3.5, while the Crystals of PstS from Syn19  
477 appeared in the condition containing 18% (w/v) polyethylene glycol 3350, 0.2 M sodium  
478 formate.

479

#### 480 **Data Collection and structure determination**

481 For diffraction analysis, the crystals were pooled and flash-frozen in liquid nitrogen after  
482 soaking in the glycerol cryoprotectant. X-ray diffraction data were collected at the beamline  
483 BL17U at the Shanghai Synchrotron Radiation Facility (SSRF). Diffraction images were  
484 processed and scaled with HKL-2000 program package (Otwinowski and Minor, 1997) to the  
485 highest resolutions of 2.25 Å for P-SSM2 PstS and 1.70 Å for Syn19 PstS, respectively. The  
486 structures were determined by molecular replacement using the program Molrep of the CCP4  
487 (Collaborative Computational Project, 1994) with *E. coli* PstS (PDB accession code 1IXH) as  
488 the search template (Wang et al., 1997). The structure refinement was performed by using the  
489 programs Coot (Emsley and Cowtan, 2004) and Refmac. The quality of the structures was  
490 analyzed by MolProbity (Chen et al., 2010). The parameters of crystal data collection and  
491 structure refinement for P-SSM2 and Syn19 PstS proteins are listed in Supplementary Tables  
492 2 and 3, respectively. All figures showing structures were prepared with PyMOL.

493

#### 494 **Modeling the interaction of cyanophage PstS with the host PstCA complex**

495 We simulated the PstCA structure of *Prochlorococcus* NATL2A by SWISS-MODEL  
496 (<https://swissmodel.expasy.org/>) using the published structure of the maltose ABC transporter  
497 MalFG (Oldham et al., 2007). Then, we docked the phage PstS structure onto the simulated  
498 PstCA models using HADDOCK (<http://haddock.science.uu.nl/services/HADDOCK2.2>).

499 HADDOCK clustered 103 structures in 11 clusters, which represent 51.5 % of the water-  
500 refined models HADDOCK generated. The best cluster, which is the most reliable according  
501 to HADDOCK, possess a Haddock score of -136.9(+/-8.7), Z-score of -2.2 and a RMSD  
502 value of 0.6 (+/-0.3) Å. The Z-score indicates how many standard deviations from the  
503 average this cluster is located in terms of score (the more negative the better).

504

### 505 **Phylogenetic analysis**

506 Among the 77 cyanomyovirus genomes available in the NCBI database (as of August  
507 2019), PstS protein sequences were identified in 24 cyanomyovirus genomes. Those 24  
508 cyanomyoviruses were shown to infect 9 *Prochlorococcus* strains and 4 *Synechococcus*  
509 strains (Sullivan et al., 2003; Sullivan et al., 2010; Sabehi et al., 2012; Hua et al., 2017; Enav  
510 et al., 2018; Zborowsky and Lindell, 2019; Jiang et al., 2020; Wang et al., 2020). PstS protein  
511 sequences of the 24 cyanomyoviruses and 13 cyanobacterial host strains were downloaded  
512 from NCBI. For phylogenetic analysis, PstS protein sequences were aligned using Clustal  
513 Omega (Madeira et al., 2019) and visualized by BOXSHADE ([https://embnet.vital-](https://embnet.vital-it.ch/software/BOX_form.html)  
514 [it.ch/software/BOX\\_form.html](https://embnet.vital-it.ch/software/BOX_form.html)). Phylogenetic inference was based on the resulting alignment  
515 and conducted using the RAxML software (Stamatakis, 2014). The phylogenetic tree was  
516 visualized by Interactive Tree of Life (<https://itol.embl.de/>) (Letunic and Bork, 2016).

517

### 518 **Data Availability**

519 PstS structures of P-SSM2 and Syn19 have been deposited in the Protein Data Bank  
520 (PDB) with the accession numbers 7DYP and 7DYO, respectively.

521

## 522 **References**

- 523 Ames, G.F., and Lever, J. (1970) Components of histidine transport: histidine-binding  
524 proteins and hisP protein. *Proc Natl Acad Sci U S A* **66**: 1096-1103.
- 525 Bosdriesz, E., Magnusdottir, S., Bruggeman, F.J., Teusink, B., and Molenaar, D. (2015)  
526 Binding proteins enhance specific uptake rate by increasing the substrate-transporter  
527 encounter rate. *FEBS J* **282**: 2394-2407.
- 528 Brautigam, C.A., Ouyang, Z., Deka, R.K., and Norgard, M.V. (2014) Sequence, biophysical,  
529 and structural analyses of the PstS lipoprotein (BB0215) from *Borrelia burgdorferi* reveal a  
530 likely binding component of an ABC-type phosphate transporter. *Protein Sci* **23**: 200-212.
- 531 Chen, V.B., Arendall, W.B., 3rd, Headd, J.J., Keedy, D.A., Immormino, R.M., Kapral, G.J. et  
532 al. (2010) MolProbity: all-atom structure validation for macromolecular crystallography. *Acta*  
533 *Crystallogr D Biol Crystallogr* **66**: 12-21.
- 534 Coleman, M.L., and Chisholm, S.W. (2010) Ecosystem-specific selection pressures revealed  
535 through comparative population genomics. *Proc Natl Acad Sci U S A* **107**: 18634-18639.
- 536 Collaborative Computational Project, N. (1994) The CCP4 suite: programs for protein  
537 crystallography. *Acta Crystallogr D Biol Crystallogr* **50**: 760-763.
- 538 Cox, A.D., and Saito, M.A. (2013) Proteomic responses of oceanic *Synechococcus* WH8102  
539 to phosphate and zinc scarcity and cadmium additions. *Front Microbiol* **4**: 387.
- 540 de Sousa Abreu, R., Penalva, L.O., Marcotte, E.M., and Vogel, C. (2009) Global signatures  
541 of protein and mRNA expression levels. *Molecular BioSystems* **5**: 1512-1526.

- 542 Elias, M., Wellner, A., Goldin-Azulay, K., Chabriere, E., Vorholt, J.A., Erb, T.J., and Tawfik,  
543 D.S. (2012) The molecular basis of phosphate discrimination in arsenate-rich environments.  
544 *Nature* **491**: 134-137.
- 545 Emsley, P., and Cowtan, K. (2004) Coot: model-building tools for molecular graphics. *Acta*  
546 *Crystallogr D Biol Crystallogr* **60**: 2126-2132.
- 547 Enav, H., Kirzner, S., Lindell, D., Mandel-Gutfreund, Y., and Beja, O. (2018) Adaptation to  
548 sub-optimal hosts is a driver of viral diversification in the ocean. *Nat Commun* **9**: 4698.
- 549 Fu, F.X., Zhang, Y.H., Bell, P.R.F., and Hutchins, D.A. (2005) Phosphate uptake and growth  
550 kinetics of *Trichodesmium* (Cyanobacteria) isolates from the North Atlantic Ocean and the  
551 Great Barrier Reef, Australia. *Journal of Phycology* **41**: 62-73.
- 552 Fuszard, M.A., Wright, P.C., and Biggs, C.A. (2010) Cellular acclimation strategies of a  
553 minimal picocyanobacterium to phosphate stress. *FEMS Microbiol Lett* **306**: 127-134.
- 554 Hsieh, Y.J., and Wanner, B.L. (2010) Global regulation by the seven-component Pi signaling  
555 system. *Curr Opin Microbiol* **13**: 198-203.
- 556 Hua, J., Huet, A., Lopez, C.A., Toropova, K., Pope, W.H., Duda, R.L. et al. (2017) Capsids  
557 and Genomes of Jumbo-Sized Bacteriophages Reveal the Evolutionary Reach of the HK97  
558 Fold. *mBio* **8**.
- 559 Jiang, T., Guo, C., Wang, M., Wang, M., You, S., Liu, Y. et al. (2020) Isolation and complete  
560 genome sequence of a novel cyanophage, S-B05, infecting an estuarine *Synechococcus* strain:  
561 insights into environmental adaptation. *Arch Virol* **165**: 1397-1407.



- 562 Jover, L.F., Effler, T.C., Buchan, A., Wilhelm, S.W., and Weitz, J.S. (2014) The elemental  
563 composition of virus particles: implications for marine biogeochemical cycles. *Nat Rev*  
564 *Microbiol* **12**: 519-528.
- 565 Kamennaya, N.A., Geraki, K., Scanlan, D.J., and Zubkov, M.V. (2020) Accumulation of  
566 ambient phosphate into the periplasm of marine bacteria is proton motive force dependent.  
567 *Nat Commun* **11**: 2642.
- 568 Kelly, L., Ding, H., Huang, K.H., Osburne, M.S., and Chisholm, S.W. (2013) Genetic  
569 diversity in cultured and wild marine cyanomyoviruses reveals phosphorus stress as a strong  
570 selective agent. *ISME J* **7**: 1827-1841.
- 571 Krumhardt, K.M., Callnan, K., Roache-Johnson, K., Swett, T., Robinson, D., Reistetter, E.N.  
572 et al. (2013) Effects of phosphorus starvation versus limitation on the marine cyanobacterium  
573 *Prochlorococcus* MED4 I: uptake physiology. *Environ Microbiol* **15**: 2114-2128.
- 574 Lamarche, M.G., Wanner, B.L., Crepin, S., and Harel, J. (2008) The phosphate regulon and  
575 bacterial virulence: a regulatory network connecting phosphate homeostasis and pathogenesis.  
576 *FEMS Microbiol Rev* **32**: 461-473.
- 577 Letunic, I., and Bork, P. (2016) Interactive tree of life (iTOL) v3: an online tool for the  
578 display and annotation of phylogenetic and other trees. *Nucleic Acids Res* **44**: W242-245.
- 579 Lin, X., Ding, H., and Zeng, Q. (2016) Transcriptomic response during phage infection of a  
580 marine cyanobacterium under phosphorus-limited conditions. *Environ Microbiol* **18**: 450-460.
- 581 Lomas, M.W., Bonachela, J.A., Levin, S.A., and Martiny, A.C. (2014) Impact of ocean  
582 phytoplankton diversity on phosphate uptake. *Proc Natl Acad Sci U S A* **111**: 17540-17545.

- 583 Luecke, H., and Quioco, F.A. (1990) High specificity of a phosphate transport protein  
584 determined by hydrogen bonds. *Nature* **347**: 402-406.
- 585 Madeira, F., Park, Y.M., Lee, J., Buso, N., Gur, T., Madhusoodanan, N. et al. (2019) The  
586 EMBL-EBI search and sequence analysis tools APIs in 2019. *Nucleic Acids Res.*
- 587 Martiny, A.C., Coleman, M.L., and Chisholm, S.W. (2006) Phosphate acquisition genes in  
588 *Prochlorococcus* ecotypes: evidence for genome-wide adaptation. *Proc Natl Acad Sci U S A*  
589 **103**: 12552-12557.
- 590 Martiny, A.C., Huang, Y., and Li, W. (2009) Occurrence of phosphate acquisition genes in  
591 *Prochlorococcus* cells from different ocean regions. *Environ Microbiol* **11**: 1340-1347.
- 592 Medveczky, N., and Rosenberg, H. (1970) The phosphate-binding protein of *Escherichia coli*.  
593 *Biochimica et Biophysica Acta (BBA) - Biomembranes* **211**: 158-168.
- 594 Michaelis, L., Menten, M.L., Johnson, K.A., and Goody, R.S. (2011) The original Michaelis  
595 constant: translation of the 1913 Michaelis-Menten paper. *Biochemistry* **50**: 8264-8269.
- 596 Modi, N., Ganguly, S., Barcena-Uribarri, I., Benz, R., van den Berg, B., and Kleinekathofer,  
597 U. (2015) Structure, dynamics, and substrate specificity of the OprO porin from  
598 *Pseudomonas aeruginosa*. *Biophys J* **109**: 1429-1438.
- 599 Moore, L.R., Post, A.F., Rocap, G., and Chisholm, S.W. (2002) Utilization of different  
600 nitrogen sources by the marine cyanobacteria *Prochlorococcus* and *Synechococcus*.  
601 *Limnology and Oceanography* **47**: 989-996.
- 602 Moore, L.R., Ostrowski, M., Scanlan, D.J., Feren, K., and Sweetsir, T. (2005) Ecotypic  
603 variation in phosphorus-acquisition mechanisms within marine picocyanobacteria. *Aquatic*  
604 *Microbial Ecology* **39**: 257-269.

- 605 Nagaya, M., Aiba, H., and Mizuno, T. (1994) The *sphR* product, a two-component system  
606 response regulator protein, regulates phosphate assimilation in *Synechococcus* sp. strain PCC  
607 7942 by binding to two sites upstream from the *phoA* promoter. *J Bacteriol* **176**: 2210-2215.
- 608 Oldham, M.L., Khare, D., Quioco, F.A., Davidson, A.L., and Chen, J. (2007) Crystal  
609 structure of a catalytic intermediate of the maltose transporter. *Nature* **450**: 515-521.
- 610 Ostrowski, M., Mazard, S., Tetu, S.G., Phillippy, K., Johnson, A., Palenik, B. et al. (2010)  
611 PtrA is required for coordinate regulation of gene expression during phosphate stress in a  
612 marine *Synechococcus*. *ISME J* **4**: 908-921.
- 613 Otwinowski, Z., and Minor, W. (1997) Processing of X-ray diffraction data collected in  
614 oscillation mode. *Methods Enzymol* **276**: 307-326.
- 615 Partensky, F., Hess, W.R., and Vaulot, D. (1999) *Prochlorococcus*, a marine photosynthetic  
616 prokaryote of global significance. *Microbiol Mol Biol Rev* **63**: 106-127.
- 617 Poole, K., and Hancock, R.E. (1984) Phosphate transport in *Pseudomonas aeruginosa*.  
618 Involvement of a periplasmic phosphate-binding protein. *Eur J Biochem* **144**: 607-612.
- 619 Reistetter, E.N., Krumhardt, K., Callnan, K., Roache-Johnson, K., Saunders, J.K., Moore,  
620 L.R., and Rocap, G. (2013) Effects of phosphorus starvation versus limitation on the marine  
621 cyanobacterium *Prochlorococcus* MED4 II: gene expression. *Environ Microbiol* **15**: 2129-  
622 2143.
- 623 Sabehi, G., Shaulov, L., Silver, D.H., Yanai, I., Harel, A., and Lindell, D. (2012) A novel  
624 lineage of myoviruses infecting cyanobacteria is widespread in the oceans. *Proc Natl Acad*  
625 *Sci U S A* **109**: 2037-2042.

- 626 Scanlan, D.J., Mann, N.H., and Carr, N.G. (1993) The response of the picoplanktonic marine  
627 cyanobacterium *Synechococcus* species WH7803 to phosphate starvation involves a protein  
628 homologous to the periplasmic phosphate-binding protein of *Escherichia coli*. *Mol Microbiol*  
629 **10**: 181-191.
- 630 Scanlan, D.J., Ostrowski, M., Mazard, S., Dufresne, A., Garczarek, L., Hess, W.R. et al.  
631 (2009) Ecological genomics of marine picocyanobacteria. *Microbiol Mol Biol Rev* **73**: 249-  
632 299.
- 633 Schwanhausser, B., Busse, D., Li, N., Dittmar, G., Schuchhardt, J., Wolf, J. et al. (2011)  
634 Global quantification of mammalian gene expression control. *Nature* **473**: 337-342.
- 635 Stamatakis, A. (2014) RAxML version 8: a tool for phylogenetic analysis and post-analysis  
636 of large phylogenies. *Bioinformatics* **30**: 1312-1313.
- 637 Sullivan, M.B., Waterbury, J.B., and Chisholm, S.W. (2003) Cyanophages infecting the  
638 oceanic cyanobacterium *Prochlorococcus*. *Nature* **424**: 1047-1051.
- 639 Sullivan, M.B., Coleman, M.L., Weigele, P., Rohwer, F., and Chisholm, S.W. (2005) Three  
640 *Prochlorococcus* cyanophage genomes: signature features and ecological interpretations.  
641 *PLoS Biol* **3**: e144.
- 642 Sullivan, M.B., Huang, K.H., Ignacio-Espinoza, J.C., Berlin, A.M., Kelly, L., Weigele, P.R.  
643 et al. (2010) Genomic analysis of oceanic cyanobacterial myoviruses compared with T4-like  
644 myoviruses from diverse hosts and environments. *Environ Microbiol* **12**: 3035-3056.
- 645 Suzuki, S., Ferjani, A., Suzuki, I., and Murata, N. (2004) The SphS-SphR two component  
646 system is the exclusive sensor for the induction of gene expression in response to phosphate  
647 limitation in *Synechocystis*. *J Biol Chem* **279**: 13234-13240.

- 648 Tetu, S.G., Brahamsha, B., Johnson, D.A., Tai, V., Phillippy, K., Palenik, B., and Paulsen, I.T.  
649 (2009) Microarray analysis of phosphate regulation in the marine cyanobacterium  
650 *Synechococcus* sp. WH8102. *ISME J* **3**: 835-849.
- 651 Thingstad, T.F., Krom, M.D., Mantoura, R.F., Flaten, G.A., Groom, S., Herut, B. et al. (2005)  
652 Nature of phosphorus limitation in the ultraoligotrophic eastern Mediterranean. *Science* **309**:  
653 1068-1071.
- 654 Thompson, L.R., Zeng, Q., Kelly, L., Huang, K.H., Singer, A.U., Stubbe, J., and Chisholm,  
655 S.W. (2011) Phage auxiliary metabolic genes and the redirection of cyanobacterial host  
656 carbon metabolism. *Proc Natl Acad Sci U S A* **108**: E757-E764.
- 657 Van Mooy, B.A., Rocap, G., Fredricks, H.F., Evans, C.T., and Devol, A.H. (2006)  
658 Sulfolipids dramatically decrease phosphorus demand by picocyanobacteria in oligotrophic  
659 marine environments. *Proc Natl Acad Sci U S A* **103**: 8607-8612.
- 660 Van Mooy, B.A., Fredricks, H.F., Pedler, B.E., Dyhrman, S.T., Karl, D.M., Koblizek, M. et  
661 al. (2009) Phytoplankton in the ocean use non-phosphorus lipids in response to phosphorus  
662 scarcity. *Nature* **458**: 69-72.
- 663 Viaene, L., Annaert, P., de Loor, H., Poesen, R., Evenepoel, P., and Meijers, B. (2013)  
664 Albumin is the main plasma binding protein for indoxyl sulfate and p-cresyl sulfate.  
665 *Biopharm Drug Dispos* **34**: 165-175.
- 666 Wang, M., Gao, C., Jiang, T., You, S., Jiang, Y., Guo, C. et al. (2020) Genomic analysis of  
667 *Synechococcus* phage S-B43 and its adaption to the coastal environment. *Virus Res* **289**:  
668 198155.

- 669 Wang, Z., Luecke, H., Yao, N., and Quioco, F.A. (1997) A low energy short hydrogen bond  
670 in very high resolution structures of protein receptor--phosphate complexes. *Nat Struct Biol* **4**:  
671 519-522.
- 672 Wu, J., Sunda, W., Boyle, E.A., and Karl, D.M. (2000) Phosphate depletion in the western  
673 North Atlantic Ocean. *Science* **289**: 759-762.
- 674 Zborowsky, S., and Lindell, D. (2019) Resistance in marine cyanobacteria differs against  
675 specialist and generalist cyanophages. *Proc Natl Acad Sci U S A* **116**: 16899-16908.
- 676 Zeng, Q., and Chisholm, S.W. (2012) Marine viruses exploit their host's two-component  
677 regulatory system in response to resource limitation. *Curr Biol* **22**: 124-128.
- 678 Zubkov, M.V., Martin, A.P., Hartmann, M., Grob, C., and Scanlan, D.J. (2015) Dominant  
679 oceanic bacteria secure phosphate using a large extracellular buffer. *Nat Commun* **6**: 7878.  
680  
681

## 682 **Figure Legends**

### 683 **Figure 1. Binding coefficient and dissociation constant of PstS proteins to phosphate**

684 **A.** A representative graph showing the binding coefficient of *Prochlorococcus* NATL2A PstS  
685 protein as a function of cold phosphate concentration. The binding coefficient is defined as  
686 the ratio of phosphate-bound PstS to the total PstS protein. A dashed line represents the non-  
687 linear regression curve fit to the Michaelis-Menten equation. **B.** The dissociation constant  $K_d$   
688 of the PstS protein to phosphate. Solid lines show the average PstS  $K_d$  values of  
689 *Prochlorococcus* NATL2A (host, n = 6) and cyanophage P-SSM2 (phage, n = 5),  
690 respectively. Asterisk indicates significant difference of  $K_d$  values of host and phage PstS  
691 proteins ( $P = 0.038$ , Student's  $t$ -test).

692

### 693 **Figure 2. Host and phage PstS protein abundances after *Prochlorococcus* NATL2A was** 694 **infected by cyanophage P-SSM2**

695 **A.** *Prochlorococcus* NATL2A cells were spun down and resuspended in nutrient-replete or  
696 P-limited growth media. **B.** At 24 h after P limitation, *Prochlorococcus* NATL2A was  
697 infected by cyanophage P-SSM2 at a phage/host ratio of 3. Extracellular phages were  
698 measured by quantitative PCR using primers for the phage *g20* gene. Error bars in **A** and **B**  
699 indicate standard deviations from three biological replicates. **C.** Quantitative western blots of  
700 host and phage PstS proteins. At 2 h and 6 h after infection under P-limited conditions, cells  
701 were collected by centrifugation, with five biological replicates for both uninfected and  
702 infected cultures (R1 to R5). Total proteins were separated on a 12% SDS-PAGE gel ( $10^8$   
703 cells per lane), transferred to a PVDF membrane, and probed with antibodies against host  
704 (top four panels) or phage PstS (bottom two panels). On the left of each gel, purified  
705 recombinant host (top four panels) or phage (bottom two panels) PstS proteins with known  
706 amounts (0.5, 0.25, 0.125  $\mu\text{g}$ ) were loaded as standards for protein quantification. Protein

707 sizes are shown on the right. **D–F**. At 2 h and 6 h after infection under P-limited conditions,  
708 host (**D**), phage (**E**), and total (**F**) PstS proteins were quantified (Supplementary Figure 3).  
709 Error bars indicate standard deviation of five biological replicates. Asterisks indicate  
710 significant changes in the infected cells compared to the uninfected cells (\*\*  $P < 0.005$  and  
711 \*\*\*  $P < 0.0001$ , Student's  $t$ -test).

712

713 **Figure 3. Phosphate uptake of *Prochlorococcus* NATL2A cells after infection by**  
714 **cyanophage P-SSM2**

715 As in Figure 2, *Prochlorococcus* NATL2A cells were infected by cyanophage P-SSM2 at a  
716 phage/host ratio of 3 at 24 h after resuspension in P-limited growth media. At 2 h and 6 h  
717 after infection, the maximum phosphate uptake rate ( $V_{\max}$ ) (**A**) and the Michaelis-Menten  
718 constant ( $K_M$ ) (**B**) of the infected cells were measured and normalized to those of the  
719 uninfected cells. Asterisk in **A** indicates that the normalized value is significantly larger than  
720 1 (dashed line) ( $n = 3$ ,  $P = 0.031$ , Student's  $t$ -test).

721

722 **Figure 4. Simulated models of cyanophage PstS binding to the host PstCA complex**

723 **A**. A simulated model shows the interaction of the PstS protein of cyanophage P-SSM2 (cyan)  
724 with PstC (green) and PstA (lightblue) of *Prochlorococcus* NATL2A. The three interface  
725 regions of PstS that interact with the PstCA complex are shown in purple and highlighted by  
726 boxes. **B**. The detailed interaction networks of the three interface regions of P-SSM2 PstS.  
727 Residues involved in the interactions are shown in sticks and are colored in purple for PstS,  
728 green for PstC and lightblue for PstA. **C**. A simulated model of PstS protein of cyanophage  
729 Syn19 (blue) interacting with PstC (green) and PstA (lightblue) of *Synechococcus* WH8102.  
730 Comparing to P-SSM2 PstS, the three interface regions of Syn19 PstS (purple) showed a  
731  $\sim 180^\circ$  rotation against the host PstCA complex. **D**. The detailed interacting networks of the



732 three interface regions of Syn19 PstS binding to PstCA. The color scheme in **D** is the same as  
733 in **B**.

734

735 **Figure 5. Phylogeny of the PstS sequences from cyanobacteria and cyanophages**

736 **A.** Phylogenetic tree of the PstS protein sequences built using the maximum likelihood

737 method. The PstS sequence of *Pseudomonas aeruginosa* was used as an outgroup to re-root

738 the tree (not shown). Locus\_tag or accession number of each protein is shown in parentheses.

739 In the tree, PstS protein sequences form four groups: I, II, III, and SphX. **B.** Sequence

740 alignments of the three interface regions of group I PstS proteins (top), and groups II, III, and

741 SphX proteins (bottom). The numbers above the top and bottom alignments indicate the

742 amino acid residue positions of P-SSM2 and Syn19 PstS proteins, respectively. Degree of

743 conservation is indicated with background shading, with dark for strongly conserved and

744 light for moderately conserved residues.

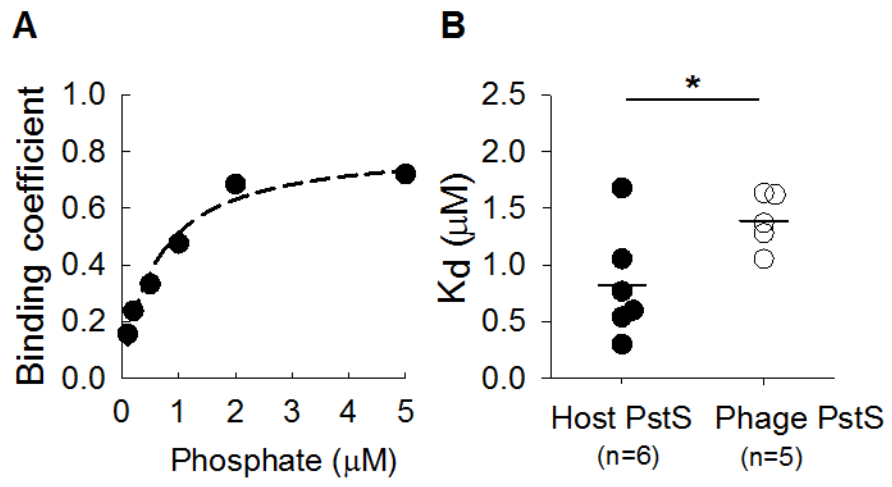

Figure 1

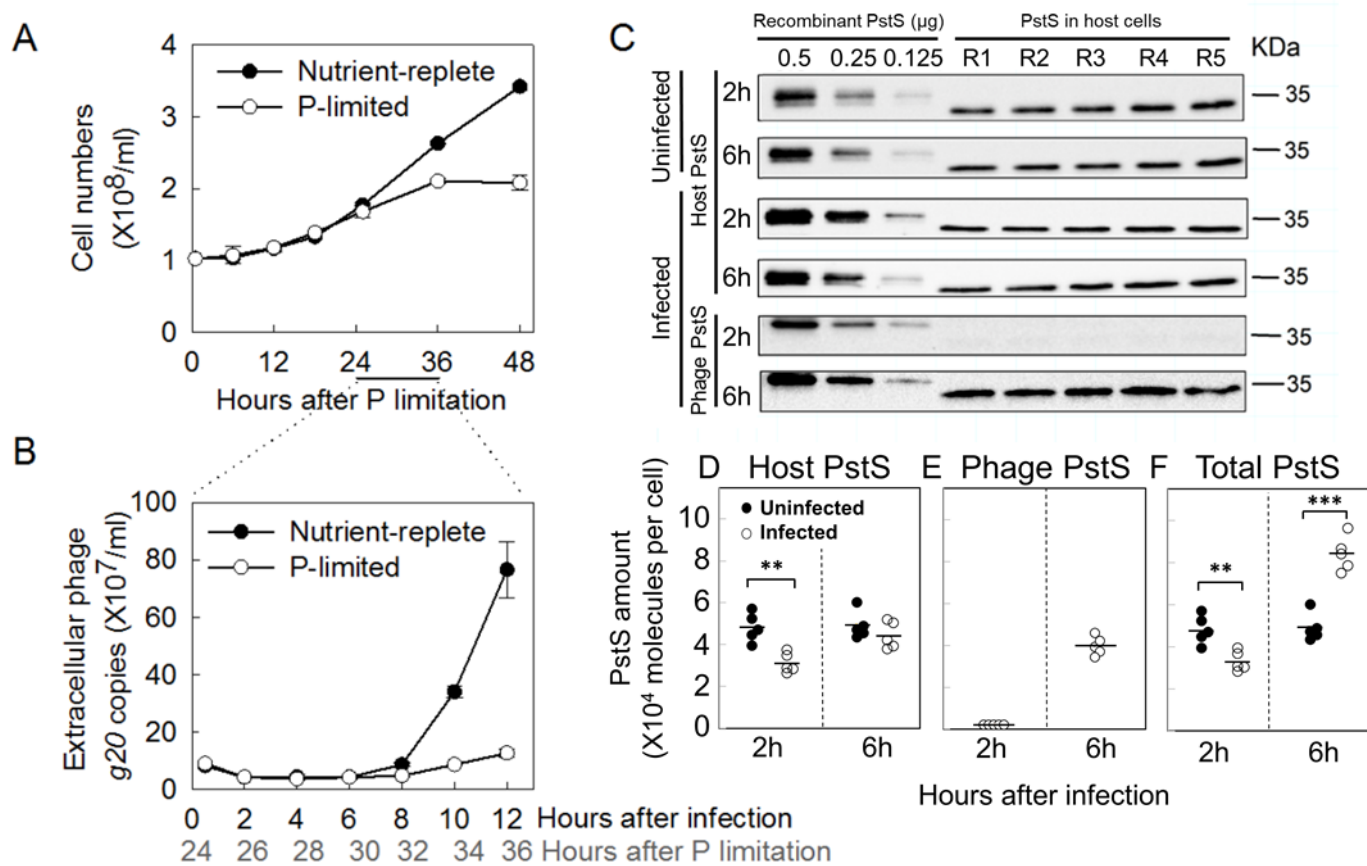

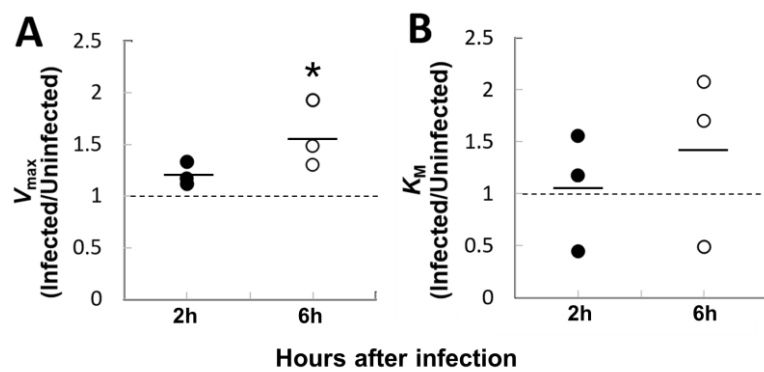

Figure 3

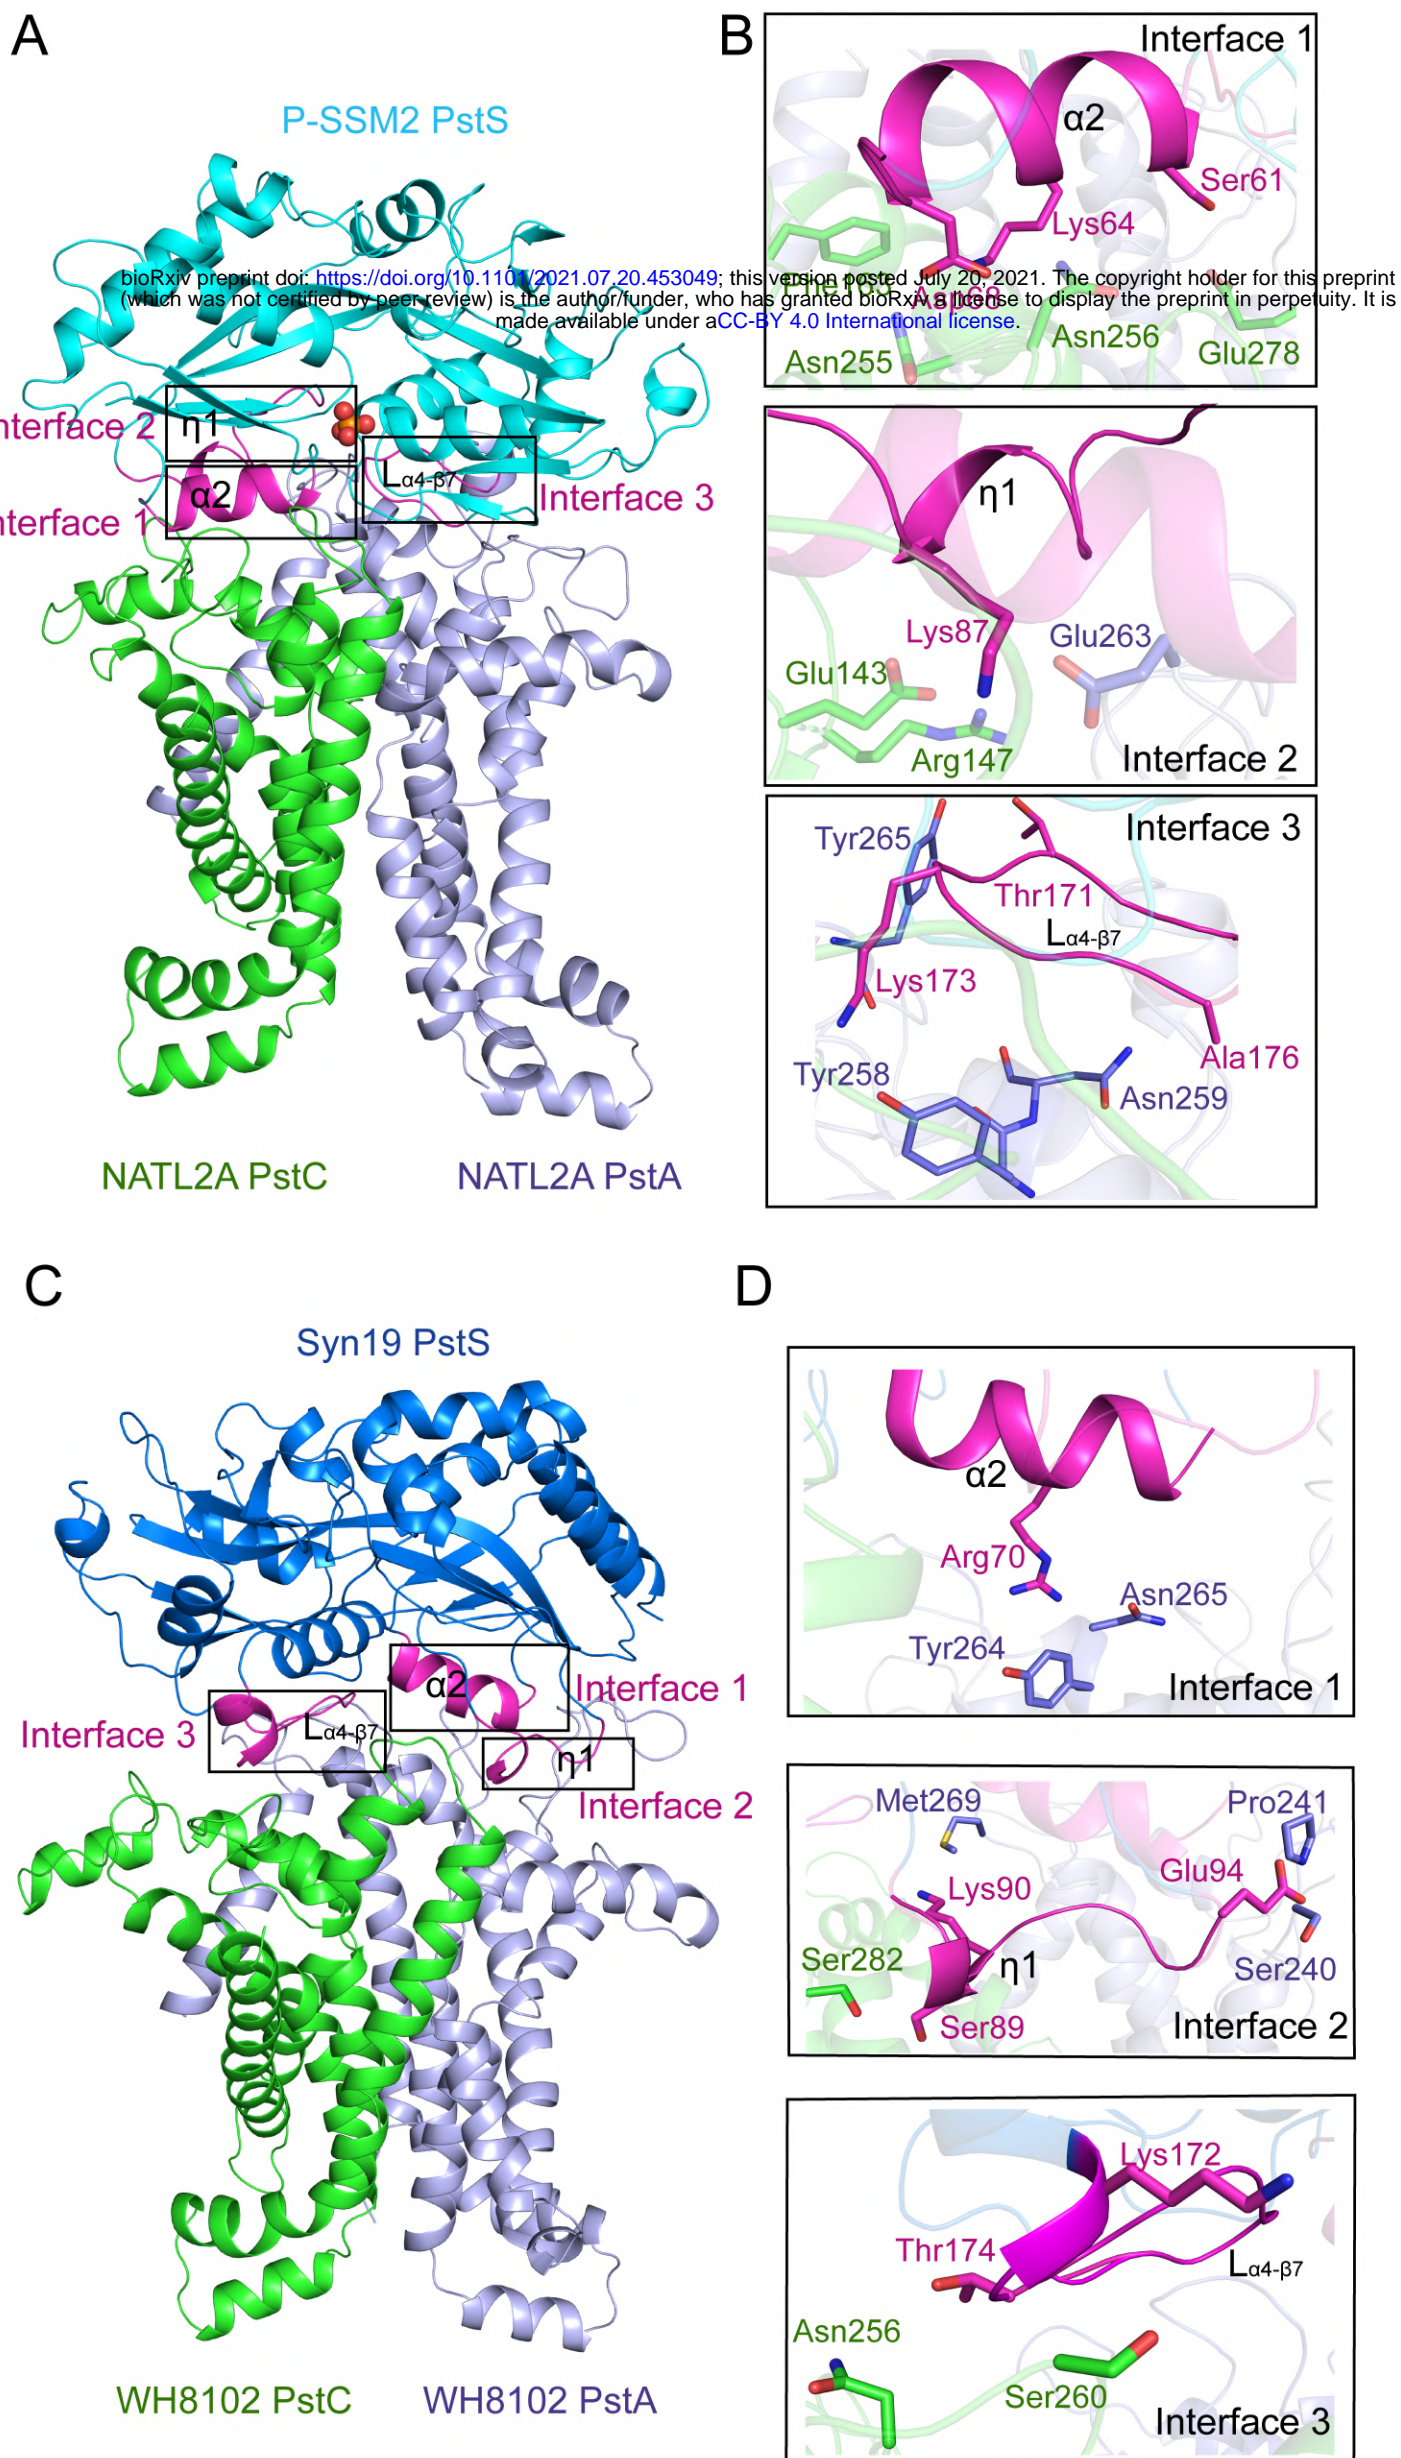

### A. Phylogenetic tree of PstS proteins

### B. Sequence alignment of the three interfaces

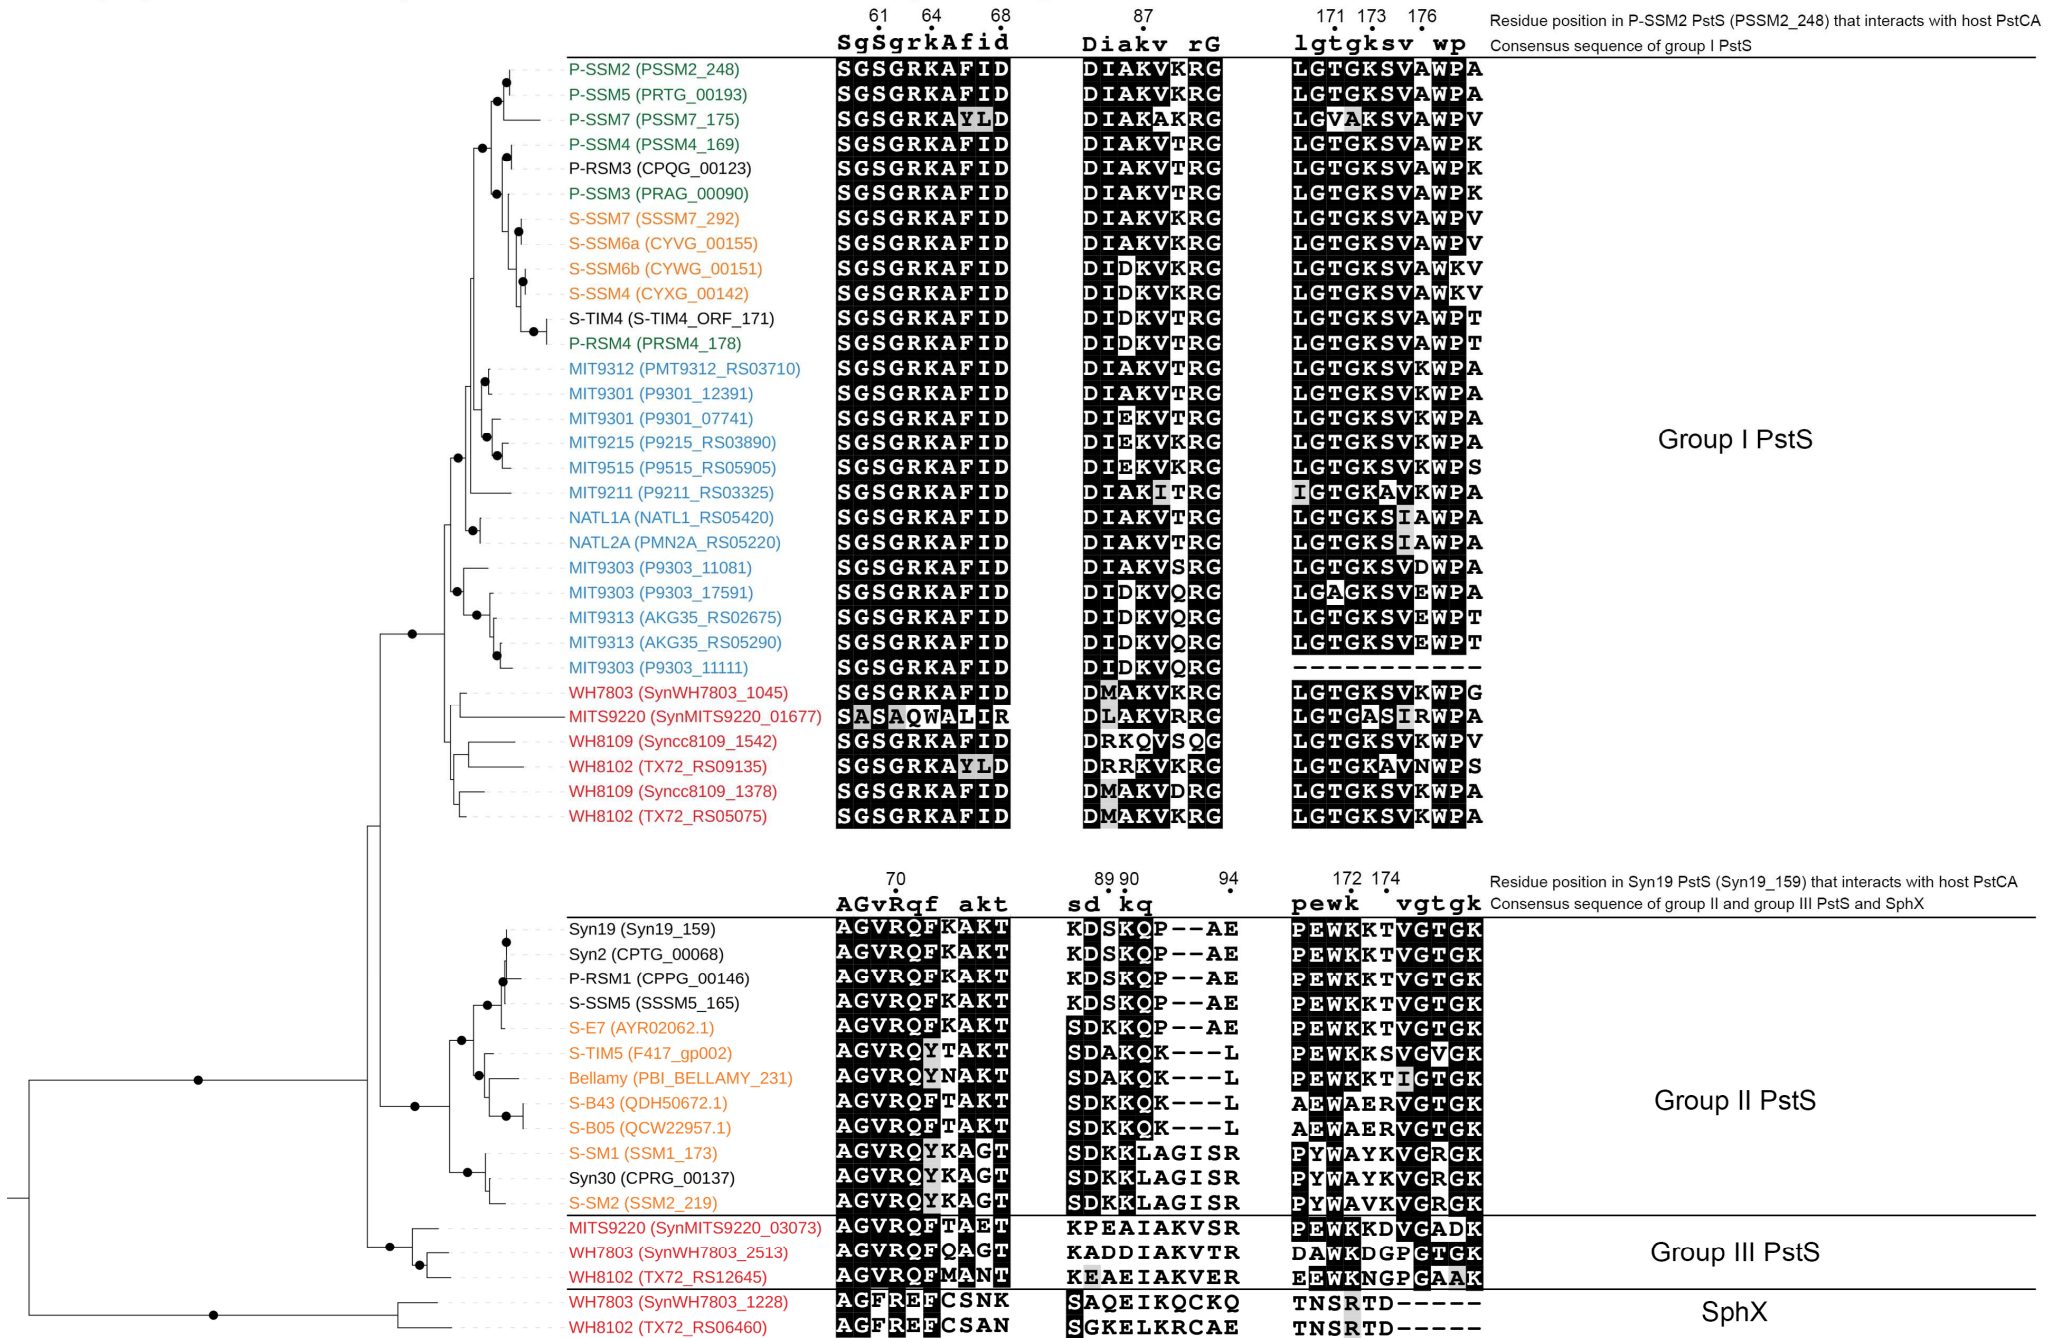

Distance of 1  
Bootstrap > 0.8

*Prochlorococcus*  
*Synechococcus*

Cyanophage infecting *Prochlorococcus*  
Cyanophage infecting *Synechococcus*  
Cyanophage infecting both *Prochlorococcus* and *Synechococcus*

Figure 5

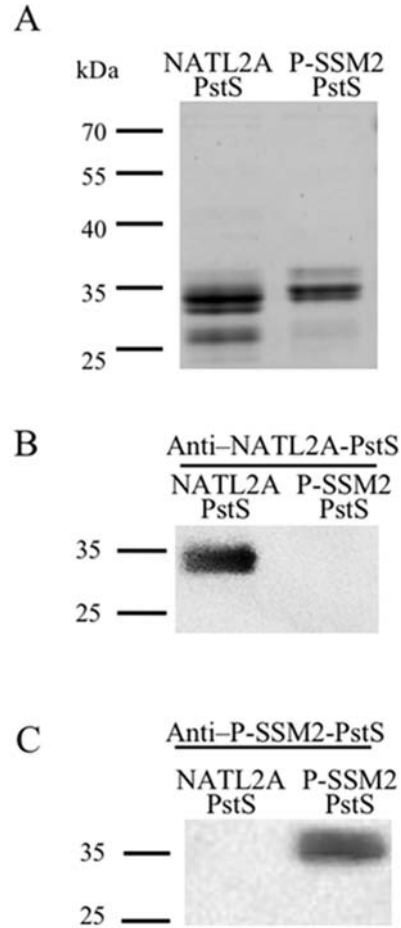

**Supplementary Figure 1. Specificity of antibodies against the PstS proteins of *Prochlorococcus* NATL2A and cyanophage P-SSM2**

The His-tagged recombinant PstS proteins of *Prochlorococcus* NATL2A and cyanophage P-SSM2 were purified and separated on 12% SDS-PAGE. Proteins were stained with Coomassie Blue (A) or transferred to membranes and probed using antibodies against NATL2A PstS (B) and P-SSM2 PstS (C). In B and C, 0.5  $\mu$ g protein was loaded in each lane. Protein sizes are shown on the left of each gel.

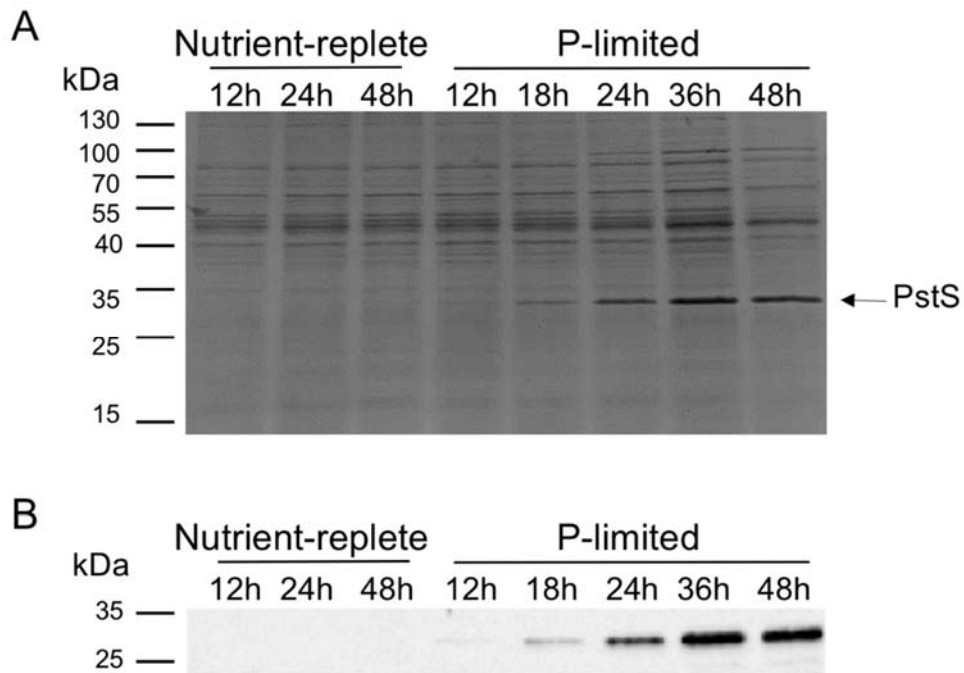

**Supplementary Figure 2. PstS protein abundances of *Prochlorococcus* NATL2A under nutrient-replete and P-limited conditions**

**A.** SDS-PAGE. *Prochlorococcus* NATL2A cells were spun down and resuspended in nutrient-replete or P-limited media. Cultures were collected at different time points after resuspension. Total protein from  $10^8$  cells was loaded in each lane and separated in SDS-PAGE. The time after resuspension is shown above each lane. Protein sizes are shown on the left of the gel. The arrow indicates the PstS protein band (~34 kDa). **B.** Western blot. Proteins from replicate SDS-PAGE were transferred to a membrane and probed with the antibody against NATL2A PstS.



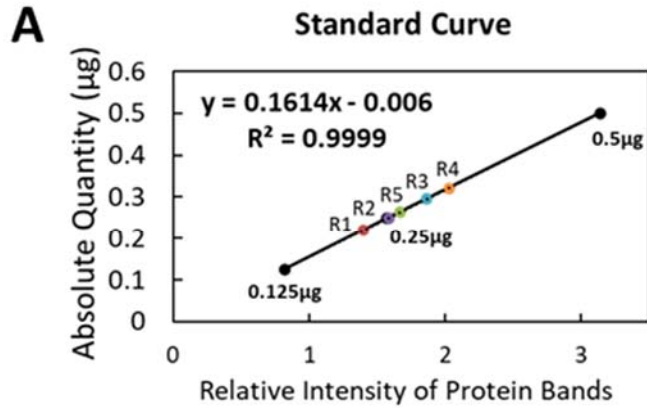

**B**

| Timepoints        | Proteins               | Replicate 1                                             | Replicate 2 | Replicate 3 | Replicate 4 | Replicate 5 | Average     |
|-------------------|------------------------|---------------------------------------------------------|-------------|-------------|-------------|-------------|-------------|
|                   |                        | µg per $10^8$ cells ( $\times 10^4$ molecules per cell) |             |             |             |             |             |
| 2h post infection | Host PstS (Uninfected) | 0.22 (3.93)                                             | 0.25 (4.45) | 0.29 (5.22) | 0.32 (5.68) | 0.26 (4.69) | 0.27 (4.78) |
|                   | Host PstS (Infected)   | 0.16 (2.88)                                             | 0.15 (2.62) | 0.16 (2.82) | 0.20 (3.47) | 0.21 (3.74) | 0.18 (3.20) |
|                   | Phage PstS             | 0.01 (0.18)                                             | 0.01 (0.18) | 0.01 (0.18) | 0.01 (0.18) | 0.01 (0.18) | 0.01 (0.18) |
| 6h post infection | Host PstS (Uninfected) | 0.27 (4.80)                                             | 0.26 (4.62) | 0.24 (4.26) | 0.27 (4.80) | 0.34 (6.04) | 0.28 (4.88) |
|                   | Host PstS (Infected)   | 0.22 (3.91)                                             | 0.21 (3.73) | 0.24 (4.26) | 0.28 (4.97) | 0.29 (5.15) | 0.25 (4.42) |
|                   | Phage PstS             | 0.22 (3.92)                                             | 0.21 (3.74) | 0.24 (4.28) | 0.26 (4.63) | 0.19 (3.38) | 0.22 (3.96) |

**Supplementary Figure 3. Quantification of PstS proteins in *Prochlorococcus* NATL2A cells using quantitative western blotting**

**A.** A representative standard curve generated using the signal volumes of protein bands in the quantitative western blots shown in Figure 2C (top panel). **B.** Based on the standard curve, amounts of PstS proteins per cell were calculated.

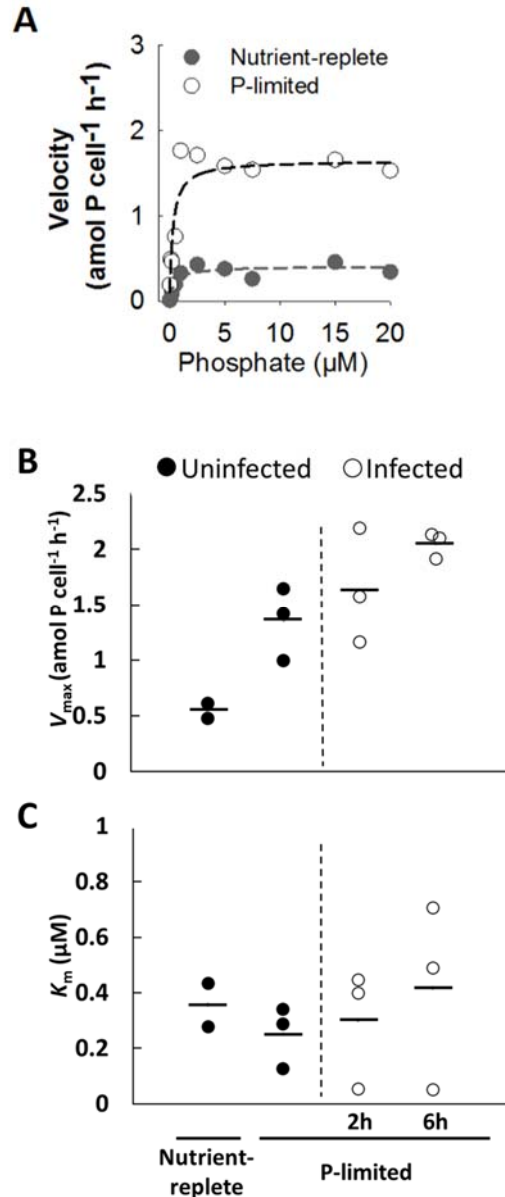

### Supplementary Figure 4. Phosphate uptake of uninfected and infected *Prochlorococcus* NATL2A cells

*Prochlorococcus* NATL2A cells were spun down and resuspended in nutrient-replete or P-limited growth media. At 24 h after resuspension, phosphate uptake velocity of uninfected *Prochlorococcus* NATL2A cells was measured as a function of cold phosphate. At 24 h after resuspension in P-limited growth media, *Prochlorococcus* NATL2A cells were infected by cyanophage P-SSM2 at a phage/host ratio of 3 and phosphate uptake velocity at 2 h and 6 h after infection was measured. **A** represents phosphate uptake curves of uninfected cells. Dashed lines in **A** represent the best fit of a hyperbolic curve. Using the phosphate uptake curves, the maximum uptake velocity ( $V_{\max}$ ) (**B**) and the Michaelis-Menten constant ( $K_M$ ) (**C**) of *Prochlorococcus* NATL2A were calculated.

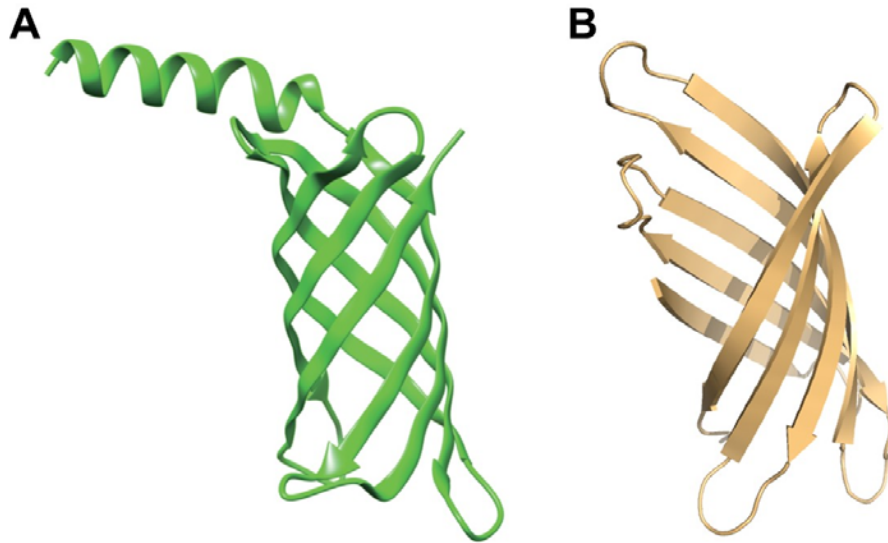

**Supplementary Figure 5. Predicted structures of cyanophage P-SSM2 gp247**

Structure of cyanophage gp247 was predicted using two methods. **A.** De novo folding structure was predicted by the tFold server (<https://drug.ai.tencent.com/console/en/tfold>). The structure with the highest ranking is shown. **B.** Structure of gp247 was predicted by the template-based modeling method via Phyre2 (<http://www.sbg.bio.ic.ac.uk/phyre2>) based on the three-dimensional structure of the outer membrane porin OprF of *Pseudomonas aeruginosa* (Phyre2 fold library ID: c4rlca; confidence score: 91.3).

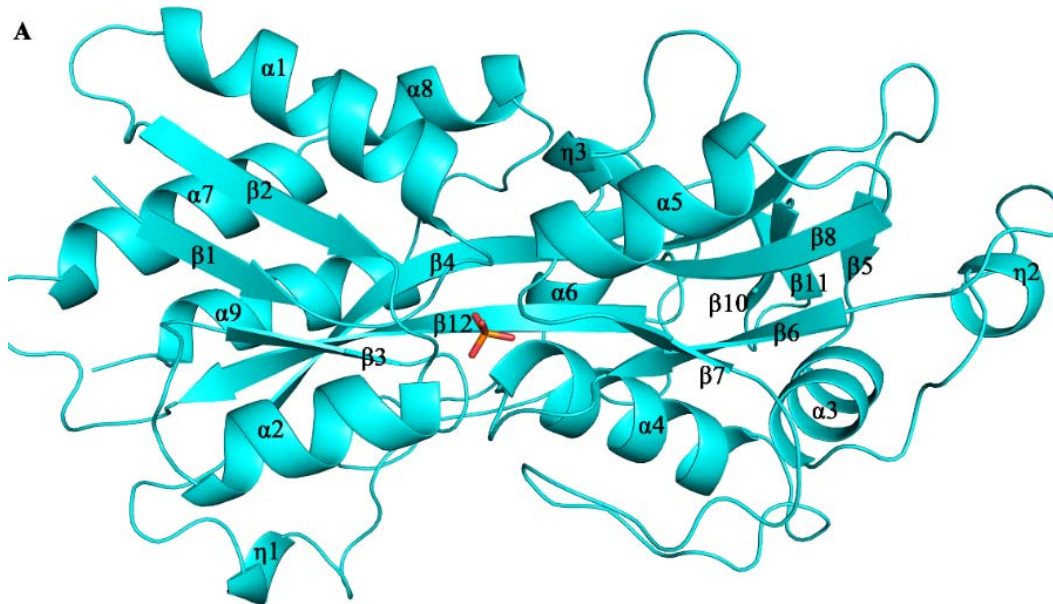

**B**

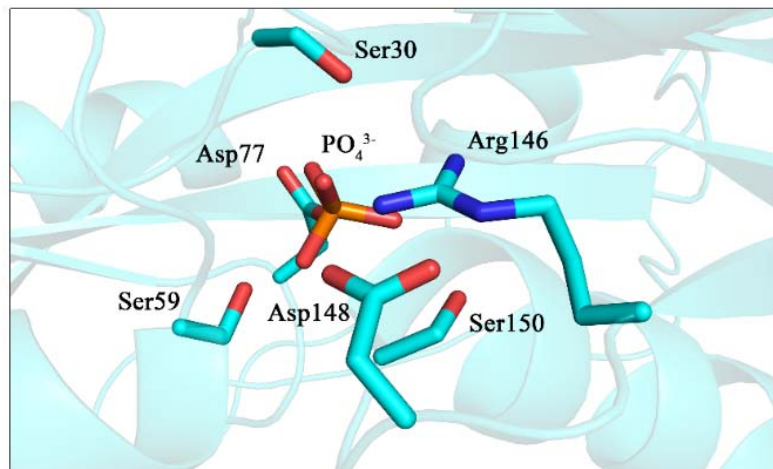

**Supplementary Figure 6. Overall structure of P-SSM2 PstS in complex with PO<sub>4</sub>**

**A.** Cartoon representation of the overall structure of the P-SSM2 PstS protein in complex with a PO<sub>4</sub> molecule (shown in red). Secondary structural elements of PstS are labeled sequentially. **B.** Detailed view of the PO<sub>4</sub>-binding site, with PO<sub>4</sub>-interacting residues shown as sticks.

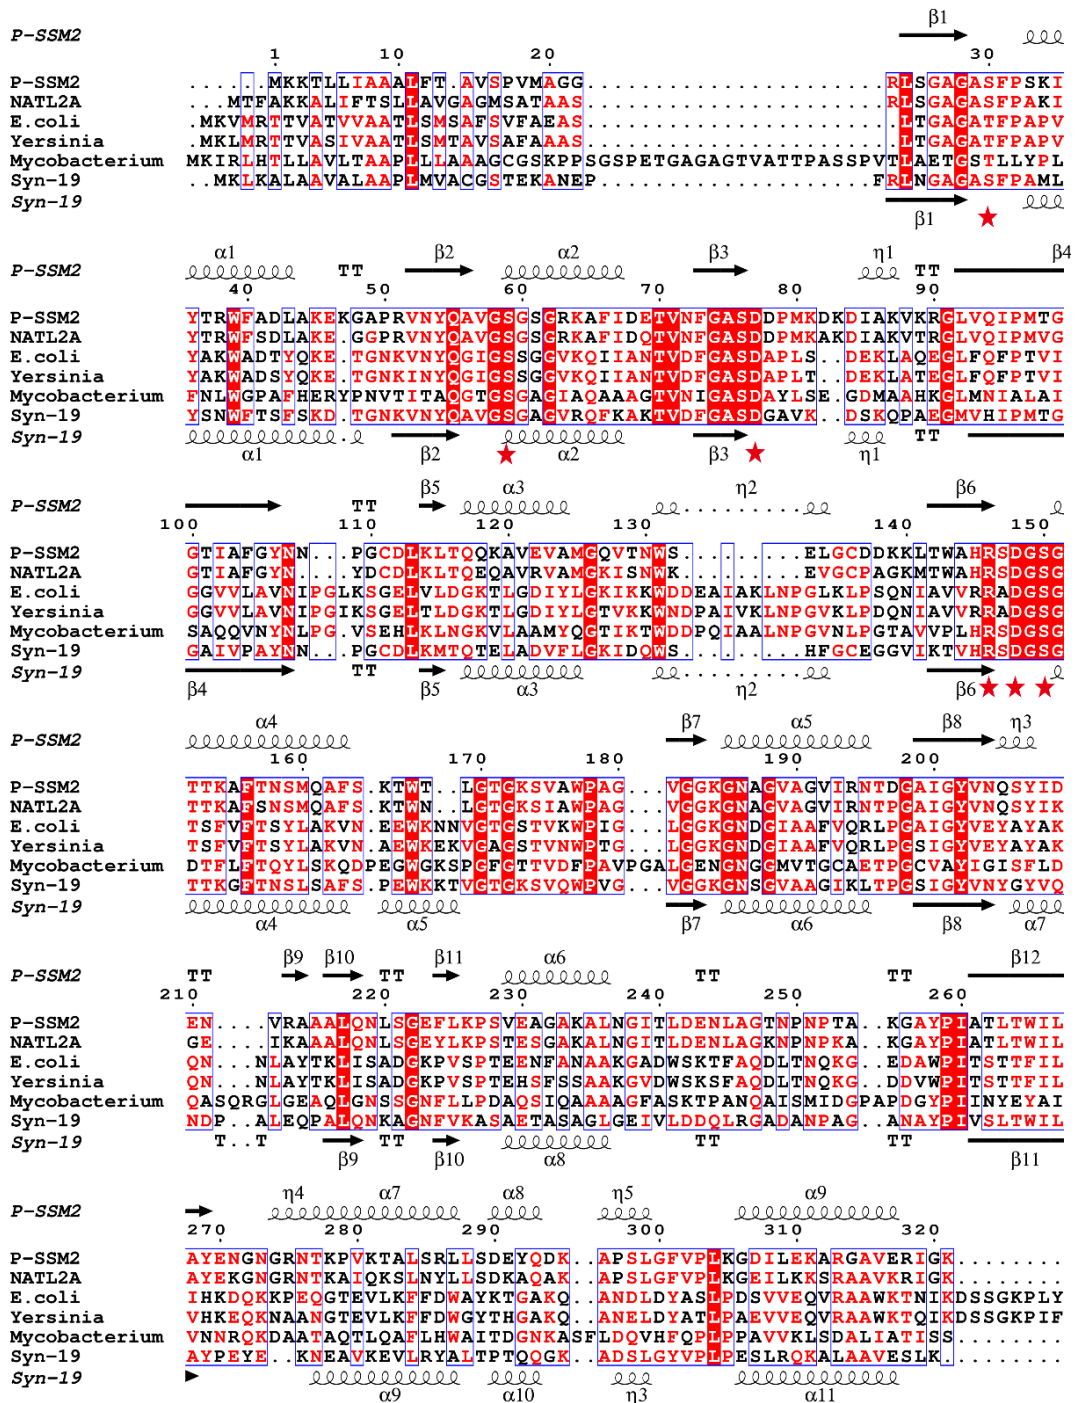

### Supplementary Figure 7. Sequence alignment of PstS proteins

The secondary structural elements of P-SSM2 PstS and Syn19 PstS are shown at the top and bottom of the PstS sequence alignment, respectively. The numbers above the sequence alignment indicate the residue numbers of P-SSM2 PstS. The phosphate-interacting residues of P-SSM2 PstS are marked by red stars. Among these residues, Ser59, Asp77, Arg146, Asp148, and Ser150 are conserved in all the PstS proteins listed here. Ser30 is conserved in cyanophage and cyanobacterial proteins, and is replaced by a chemically similar amino acid threonine in other PstS proteins.

## A. PstC alignment

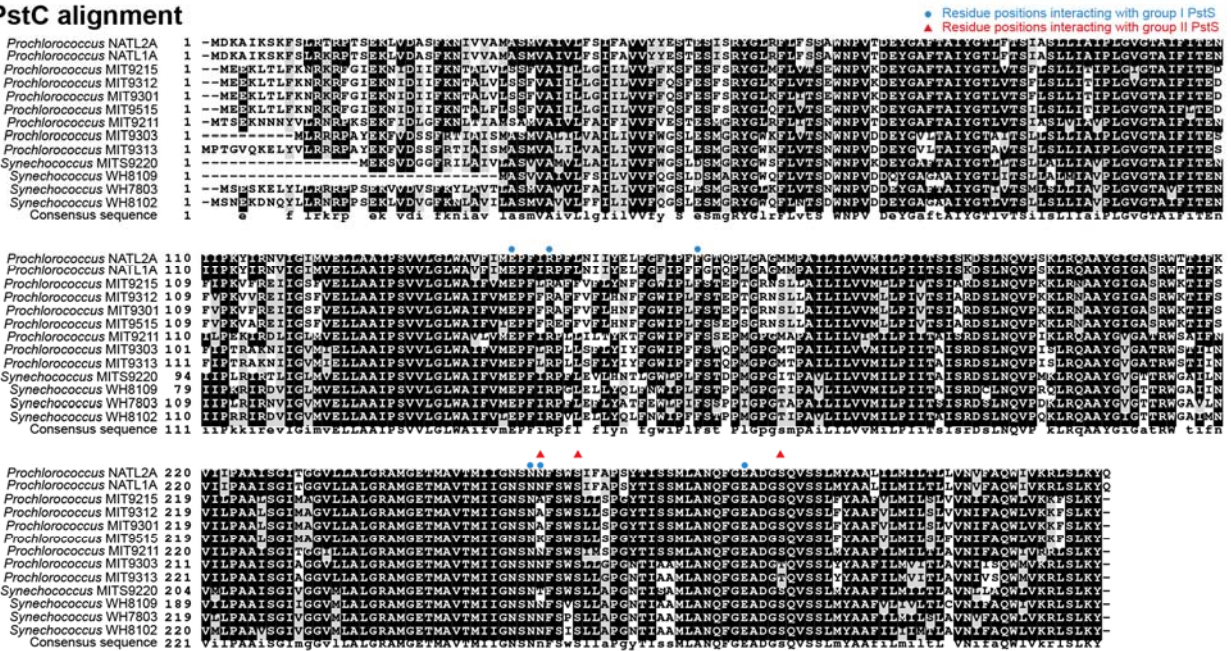

## B. PstA alignment

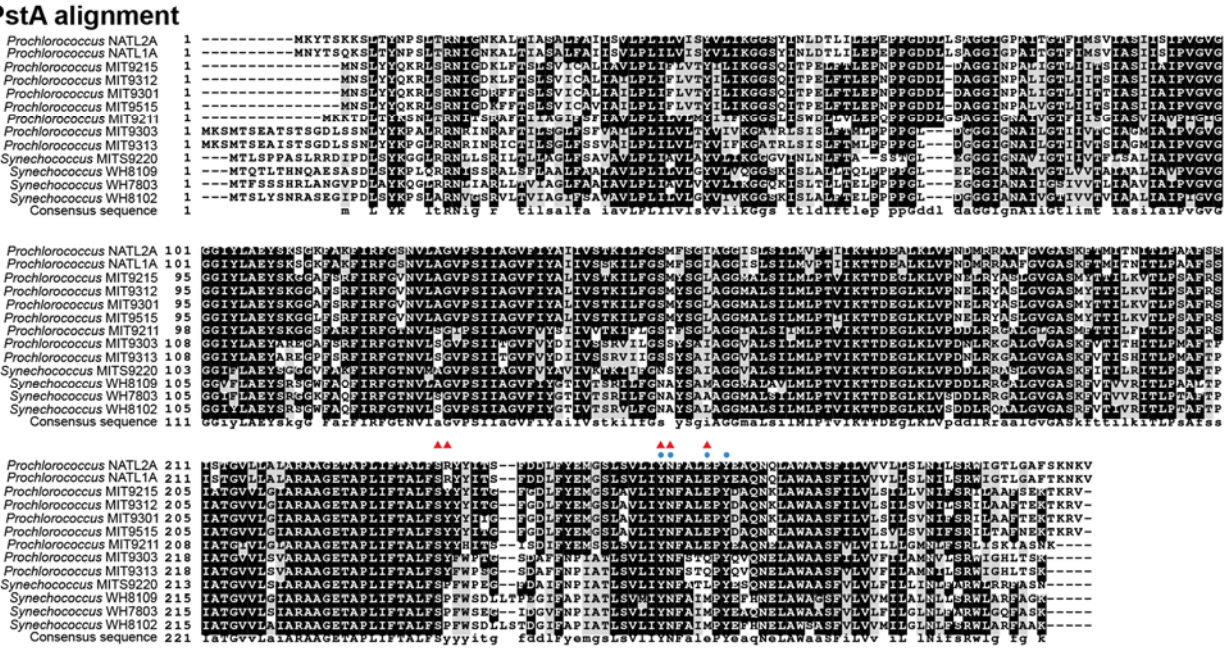

**Supplementary Figure 8. Sequence alignment of cyanobacterial PstC and PstA proteins**  
 Protein sequence alignments are shown for cyanobacterial PstC (A) and PstA (B). The background shading indicates the degree of conservation, with black for strongly conserved and grey for moderately conserved residues. Putative residues interacting with group I PstS are marked with blue circles and those interacting with group II PstS are marked with red triangles.

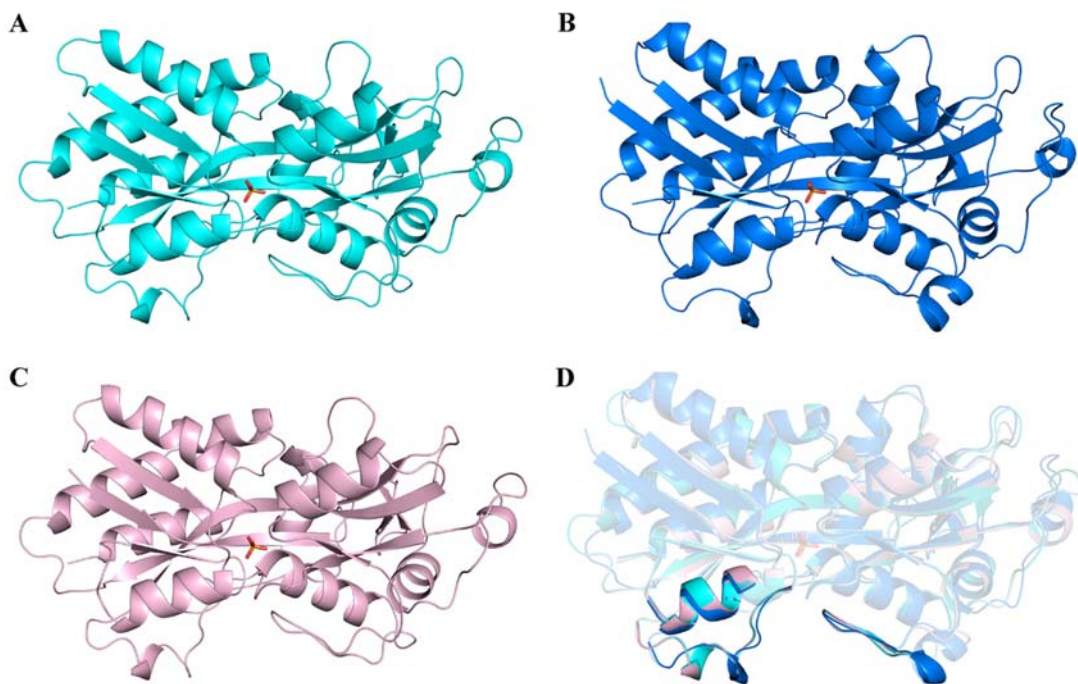

**Supplementary Figure 9. Overall structures of PstS proteins**

**A.** The PstS structure of cyanophage P-SSM2 in complex with PO<sub>4</sub> (red symbol). **B.** The PstS structure of cyanophage Syn19 in complex with PO<sub>4</sub>. **C.** A model of PstS structure of *Prochlorococcus* NATL2A in complex with PO<sub>4</sub>. **D.** Superposition of PstS proteins of P-SSM2 (cyan), Syn19 (blue) and NATL2A (light pink). The segments involved in interaction with PstCA are highlighted.

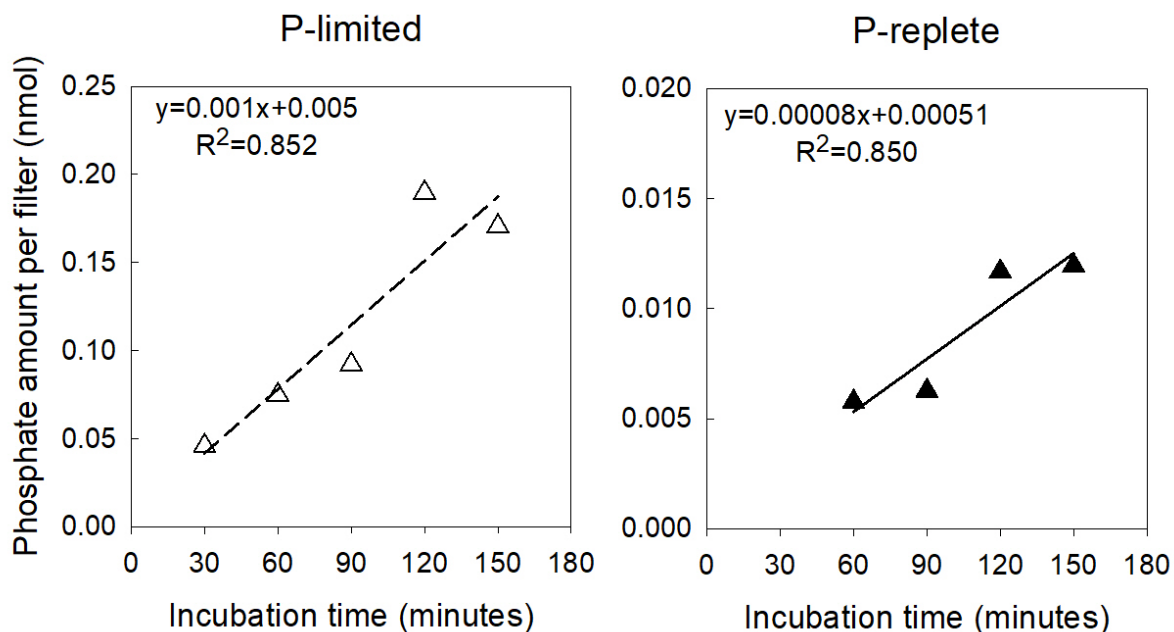

**Supplementary Figure 10. Phosphate uptake by *Prochlorococcus* NATL2A over time**

Axenic *Prochlorococcus* NATL2A cells were grown under P-limited (left panel) or P-replete (right panel) conditions. To measure phosphate uptake rates, *Prochlorococcus* cells were pelleted by centrifugation and resuspended with the Pro99 medium without addition of phosphate. Resuspended cells were amended with 10  $\mu\text{M}$  cold  $\text{NaH}_2\text{PO}_4$  and trace amount of  $^{32}\text{P}$ -labeled orthophosphoric acid ( $\sim 1 \mu\text{Ci}$ , Perkin Elmer). Every 30 min, 1 ml culture was filtered through a 0.22  $\mu\text{m}$  polycarbonate filter that was supported by a Whatman GF/F filter. During filtration, the vacuum pressure was  $\sim 100 \text{ mm Hg}$ . The phosphate uptake amount by 1 ml culture was estimated by measuring the radioactivity on each filter.
